# Supplementary material for: Zirconium catalysed intermolecular hydroamination reactions of secondary amines with alkynes
Source: Royal Society of Chemistry journal article supplement (doi:10.1039/c5cc01780g), 2015-01-01
Supplement: c5cc01780g1.pdf [file c5cc01780g1.pdf]

## **Supporting Information**

### **Zirconium catalysed intermolecular hydroamination reactions of secondary amines with alkynes**

Qiu Sun,<sup>†</sup> Yaorong Wang,<sup>†</sup> Dan Yuan,<sup>†\*</sup> Yingming Yao<sup>†\*</sup> and Qi Shen<sup>†</sup>

<sup>†</sup> Key Laboratory of Organic Synthesis of Jiangsu Province, College of Chemistry, Chemical Engineering and Materials Science, Dushu Lake Campus, Soochow University, Suzhou 215123, People's Republic of China

\* To whom correspondence should be addressed. Email: yuandan@suda.edu.cn (D. Y.); yaoym@suda.edu.cn (Y. Y.)

#### **Table of contents**

|                                                                                                    |     |
|----------------------------------------------------------------------------------------------------|-----|
| <b>General considerations</b> .....                                                                | S2  |
| <b>Synthesis and characterization of complex 3</b> .....                                           | S3  |
| <b>General procedure for hydroamination reactions</b> .....                                        | S4  |
| <b>Characterizations of hydroamination products</b> .....                                          | S5  |
| <b><sup>1</sup>H and <sup>13</sup>C NMR spectra of complex 3 and hydroamination products</b> ..... | S13 |
| <b><sup>1</sup>H NMR spectra for kinetic study</b> .....                                           | S35 |
| <b>Crystallographic data for complex 3</b> .....                                                   | S38 |

## General considerations

All manipulations of air- and/or moisture-sensitive compounds were performed under nitrogen atmosphere using standard Schlenk or glovebox techniques.  $^1\text{H}$  and  $^{13}\text{C}$  NMR spectra were recorded on a Varian XL 400 MHz spectrometer. Carbon, hydrogen, and nitrogen analyses were performed by direct combustion with a Carlo-Erba EA-1110 instrument. The FT-IR spectra were recorded with a Nicolet-550 FT-IR spectrometer as KBr pellets. X-ray crystallographic data were collected using a Bruker AXS D8 X-ray diffractometer. HR-MS data were recorded by Bruker ESI-TOF. Toluene and hexane were freshly distilled by refluxing over sodium/benzophenone ketyl and distilled prior to use.  $\text{C}_6\text{H}_5\text{Cl}$ ,  $\text{C}_6\text{D}_6$  and  $\text{C}_6\text{D}_5\text{Cl}$  were degassed and distilled over  $\text{CaH}_2$ .  $[\text{Ph}_3\text{C}][\text{B}(\text{C}_6\text{F}_5)_4]$  purchased from Strem Chemicals, Inc. was used without purification.  $\text{ZrBn}_4$ , the ligand precursors  $\text{L}^1\text{H}_2$  and  $\text{L}^2\text{H}_2$ , and complexes **1** and **2** were prepared according to reported procedures.<sup>1</sup> Amines were distilled over  $\text{CaH}_2$ . Alkynes were degassed, flushed with argon and stored over molecular sieves (4 Å).

Suitable single crystals of complexes **3** were sealed in a thin-walled glass capillary for determination the single-crystal structures. All data were collected with a Bruker AXS D8 X-ray diffractometer, using  $\text{Mo-K}_\alpha$  radiation at 223(2) K with the SMART suite of Programs.<sup>2</sup> Data were processed and corrected for Lorentz and polarization effects with SAINT,<sup>3</sup> and for absorption effect with SADABS.<sup>4</sup> Structural solution and refinement were carried out with the SHELXTL suite of programs.<sup>5</sup> The structure was solved by direct methods to locate the heavy atoms, followed by difference maps for the light, non-hydrogen atoms. All non-hydrogen atoms were generally given anisotropic displacement parameters in the final model. All H-atoms were put at calculated positions. A summary of the most important crystallographic data is given in Table S2.

### Synthesis and characterization of complex 3

To a solution of  $\text{ZrBn}_4$  (1.37 g, 3 mmol) in toluene (5 mL) was added dropwise  $\text{L}^2\text{H}_2$  (1.53 g, 3 mmol) in toluene (5 mL) at room temperature over 15 min. After stirring for 2 hours, toluene was removed under reduced pressure and hexane (5 mL) was added to extract the residue. Complex **3** was obtained as colorless solid after the hexane solution was cooled to  $-30\text{ }^\circ\text{C}$  (1.90 g, 2.7 mmol, 90%). Crystals suitable for X-ray diffraction analyses were grown from hexane solution at room temperature. IR (neat):  $\nu = 2958, 2905, 2868, 1479, 1442, 1415, 1386, 1267, 1239, 1240, 1203, 1171, 1132, 847, 753, 738, 551, 470\text{ cm}^{-1}$ .  $^1\text{H}$  NMR (400 MHz,  $\text{C}_6\text{D}_6$ ):  $\delta$  7.78 (d, 2H,  $J = 7.76\text{ Hz}$ , Ar-H), 7.58 (s, 2H, Ar-H), 7.32-7.28 (m, 2H, Ar-H), 7.15-7.13 (m, 1H, Ar-H), 6.96-6.93 (m, 4H, Ar-H), 6.78-6.74 (m, 2H, Ar-H), 6.65-6.62 (m, 1H, Ar-H), 3.32 (d, 2H,  $J = 16\text{ Hz}$ ,  $\text{PhCH}_2$ ), 3.02 (s, 2,  $\text{NCH}_2$ ), 2.98 (d, 2H,  $J = 16\text{ Hz}$ ,  $\text{PhCH}_2$ ), 2.08 (m, 2H,  $\text{NCH}_2$ ), 1.98 (s, 2,  $\text{NCH}_2\text{C}$ ), 1.80 (s, 18H,  $o\text{-C}(\text{CH}_3)_3$ ), 1.36 (s, 18H,  $p\text{-C}(\text{CH}_3)_3$ ), 1.01 (m, 2H,  $\text{CCH}_2\text{C}_2\text{H}_5$ ), 0.32 (m, 5H,  $\text{CC}_2\text{H}_5$ ).  $^{13}\text{C}\{^1\text{H}\}$  NMR (100 MHz,  $\text{C}_6\text{D}_6$ ): 156.8, 146.8, 140.5, 136.0, 135.4, 129.9, 128.0, 124.4, 124.0, 123.5, 121.2 (Ar-C), 59.4 ( $\text{PhCH}_2$ ), 57.5 ( $\text{NCH}_2$ ), 42.0 ( $\text{NCH}_2\text{C}_3\text{H}_7$ ), 34.6 ( $\text{C}(\text{CH}_3)_3$ ), 33.5 ( $\text{C}(\text{CH}_3)_3$ ), 31.1 ( $\text{C}(\text{CH}_3)_3$ ), 29.8 ( $\text{C}(\text{CH}_3)_3$ ), 21.2 ( $\text{CH}_2\text{CH}_2\text{C}_2\text{H}_5$ ), 18.7 ( $\text{C}_2\text{H}_4\text{CH}_2\text{CH}_3$ ), 12.8 ( $\text{C}_3\text{H}_6\text{CH}_3$ ). Anal. Calcd for  $\text{C}_{48}\text{H}_{67}\text{NO}_2\text{Zr}$ : C, 73.79; H, 8.64; N, 1.79. Found: C, 73.81; H, 8.66; N, 1.79.

### General procedure for hydroamination reactions

In a glovebox filled with nitrogen, PhCl solution (1 mL) of  $[\text{Ph}_3\text{C}][\text{B}(\text{C}_6\text{F}_5)_4]$  (92 mg, 0.01 mmol) was added to PhCl solution (1 mL) of **3** (78 mg, 0.01 mmol) under stirring. A color change from orange to colorless was observed immediately. After 5 min, **4** (1 mmol) and **5** (2 mmol) were added to the mixture. The resulting solution was stirred at 110 °C for desired time. After the mixture was cooled to 0 °C,  $\text{LiAlH}_4$  (76 mg, 2 mmol) was added, and the resulting mixture was stirred at 60 °C for 2 hours. The reaction was quenched by the aqueous solution of NaOH (6 M). The product was extracted with toluene ( $3 \times 1$  mL). The crude product obtained after removal of solvent was isolated by column chromatography (petroleum ether, silica gel, 0.5%  $\text{NEt}_3$ ) as viscous colorless oil and characterized by  $^1\text{H}$  and  $^{13}\text{C}$  NMR spectroscopy and HR MS.

## Characterizations of hydroamination products

**1-(1-phenylethyl)-1,2,3,4-tetrahydroquinoline (6a).**  $^1\text{H}$  NMR (400 MHz,  $\text{CDCl}_3$ ):  $\delta$  7.35-7.29 (m, 4H, Ar-H), 7.25-7.21 (m, 1H, Ar-H), 7.04-6.96. (m, 2H, Ar-H), 6.69 (d, 1H,  $J = 8.28$  Hz, Ar-H), 6.59-6.55 (m, 2H, Ar-H), 5.12 (q, 1H, CH), 3.17-2.99 (m, 2H,  $\text{NCH}_2\text{C}$ ), 2.83-2.70 (m, 2H,  $\text{NCCH}_2\text{C}$ ), 1.89-1.82 (m, 2H,  $\text{NCCCH}_2$ ), 1.57 (d, 3H,  $J = 6.96$  Hz,  $\text{CHCH}_3$ ).  $^{13}\text{C}\{^1\text{H}\}$  NMR (100 MHz,  $\text{CDCl}_3$ ): 145.6, 142.8, 129.3, 128.4, 127.2, 127.0, 126.8, 122.9, 115.5, 110.7 (Ar-C), 54.7(CH), 42.6, 28.6, 22.3 ( $\text{CH}_2$ ), 16.0 ( $\text{CH}_3$ ). HR MS (ESI+): Found 238.1594  $[\text{M}+\text{H}]^+$ , calcd. for  $\text{C}_{17}\text{H}_{20}\text{N}^+$ : 238.1596.

**1-(1-(2-fluorophenyl)ethyl)-1,2,3,4-tetrahydroquinoline (6b).**  $^1\text{H}$  NMR (400 MHz,  $\text{CDCl}_3$ ):  $\delta$  7.37-7.35 (m, 1H, Ar-H), 7.22-7.04 (m, 5H, Ar-H), 6.68-6.63 (m, 2H, Ar-H), 5.35(q, 1H, CH), 3.43-3.31 (m, 2H,  $\text{NCH}_2\text{C}$ ), 2.87-2.81 (m, 2H,  $\text{NCCH}_2\text{C}$ ), 2.02-1.96 (m, 2H,  $\text{NCCCH}_2$ ), 1.68 (d, 3H,  $J = 6.96$  Hz,  $\text{CH}_3$ ).  $^{13}\text{C}\{^1\text{H}\}$  NMR (100 MHz,  $\text{CDCl}_3$ ): 162.1, 160.0, 145.0, 129.9, 129.5, 129.1, 128.5, 128.4, 127.9, 127.6, 127.2, 126.4, 126.0, 124.1, 122.7, 115.6, 110.9 (Ar-C), 50.8(CH), 43.1, 28.6, 22.5( $\text{CH}_2$ ), 17.3 ( $\text{CH}_3$ ). HR MS (ESI+): Found 256.1503  $[\text{M}+\text{H}]^+$ , calcd. for  $\text{C}_{17}\text{H}_{19}\text{FN}^+$ : 256.1502.

**1-(1-(*m*-tolyl)ethyl)-1,2,3,4-tetrahydroquinoline (6c).**  $^1\text{H}$  NMR (400 MHz,  $\text{CDCl}_3$ ):  $\delta$  7.24-7.21 (m, 1H, Ar-H), 7.19-7.12 (m, 2H, Ar-H), 7.06-6.97 (m, 3H, Ar-H), 6.71-6.69 (m, 1H, Ar-H), 6.58-6.55 (m, 2H, Ar-H), 5.08 (q, 1H, CH), 3.13-3.00 (m, 2H,  $\text{NCH}_2\text{C}$ ), 2.76-2.72 (m, 2H,  $\text{NCCH}_2\text{C}$ ), 2.34 (s, 3H, Ar- $\text{CH}_3$ ), 1.86-1.83 (m, 2H,  $\text{NCCCH}_2$ ), 1.55 (d, 3H,  $J = 6.96$  Hz,  $\text{CH}_3$ ).  $^{13}\text{C}\{^1\text{H}\}$  NMR (100 MHz,  $\text{CDCl}_3$ ): 145.7, 142.8, 138.0, 129.3, 127.7, 127.5, 127.2, 124.0, 122.8, 115.4, 110.6 (Ar-C), 54.6 (CH),

42.6, 28.6, 22.3 (CH<sub>2</sub>), 21.6 (ArCH<sub>3</sub>), 16.0 (CH<sub>3</sub>). HR MS (ESI+): Found 252.1748 [M+H]<sup>+</sup>, calcd. for C<sub>18</sub>H<sub>22</sub>N<sup>+</sup>: 252.1752.

**1-(1-(3-bromophenyl)ethyl)-1,2,3,4-tetrahydroquinoline (6d).** <sup>1</sup>H NMR (400 MHz, CDCl<sub>3</sub>): δ 7.51 (s, 1H, Ar-H), 7.39-7.37 (m, 1H, Ar-H), 7.20-7.13 (m, 3H, Ar-H), 7.06-7.00 (m, 2H, Ar-H), 6.68-6.60 (m, 2H, Ar-H), 5.08 (q, 1H, CH), 3.15-3.01 (m, 2H, NCH<sub>2</sub>C), 2.79-2.74 (m, 2H, NCCH<sub>2</sub>C), 1.90-1.85 (m, 2H, NCCCH<sub>2</sub>), 1.56 (d, 3H, J = 6.96 Hz, CH<sub>3</sub>). <sup>13</sup>C{<sup>1</sup>H} NMR (101 MHz, CDCl<sub>3</sub>): 145.7, 145.4, 144.0, 129.6, 128.4, 127.7, 127.3, 126.4, 125.7, 123.1, 122.9, 116.0, 111.0 (Ar-C), 54.6 (CH), 42.8, 28.6, 22.4 (CH<sub>2</sub>), 16.2 (CH<sub>3</sub>). HR MS (ESI+): Found 316.0703 [M+H]<sup>+</sup>, calcd. for C<sub>17</sub>H<sub>19</sub>BrN<sup>+</sup>: 316.0701.

**1-(1-(p-tolyl)ethyl)-1,2,3,4-tetrahydroquinoline (6e).** <sup>1</sup>H NMR (400 MHz, CDCl<sub>3</sub>): δ 7.26-7.24 (m, 2H, Ar-H), 7.17-7.15 (m, 2H, Ar-H), 7.07-6.99 (m, 2H, Ar-H), 6.74-6.72 (m, 1H, Ar-H), 6.61-6.58 (m, 1H, Ar-H), 5.13 (q, 1H, CH), 3.15-3.02 (m, 2H, NCH<sub>2</sub>C), 2.77-2.74 (m, 2H, NCCH<sub>2</sub>C), 2.36 (s, 3H, Ar-CH<sub>3</sub>), 1.88-1.84 (m, 2H, NCCCH<sub>2</sub>), 1.58 (d, 3H, J = 6.96 Hz, CH<sub>3</sub>). <sup>13</sup>C{<sup>1</sup>H} NMR (100 MHz, CDCl<sub>3</sub>): 145.7, 139.7, 136.3, 129.3, 129.1, 127.2, 127.0, 122.9, 115.4, 110.7 (Ar-C), 54.4 (CH), 42.5, 28.6, 22.3 (CH<sub>2</sub>), 21.1 (ArCH<sub>3</sub>), 16.0 (CH<sub>3</sub>). HR MS (ESI+): Found 252.1749 [M+H]<sup>+</sup>, calcd. for C<sub>18</sub>H<sub>22</sub>N<sup>+</sup>: 252.1752.

**1-(1-(4-fluorophenyl)ethyl)-1,2,3,4-tetrahydroquinoline (6f).** <sup>1</sup>H NMR (400 MHz, CDCl<sub>3</sub>): δ 7.31-7.27 (m, 2H, Ar-H), 7.10-6.90 (m, 4H, Ar-H), 6.69-6.68 (m, 1H, Ar-H), 6.62-6.57 (m, 1H, Ar-H), 5.09 (q, 1H, CH), 3.12-2.95 (m, 2H, NCH<sub>2</sub>C), 2.79-2.73 (m, 2H, NCCH<sub>2</sub>C), 1.88-1.80 (m, 2H, NCCCH<sub>2</sub>), 1.56 (d, 3H, J = 6.96 Hz, CH<sub>3</sub>).

$^{13}\text{C}\{^1\text{H}\}$  NMR (100 MHz,  $\text{CDCl}_3$ ): 145.5, 142.2, 131.1, 129.8, 129.5, 128.5, 128.4, 128.3, 127.2, 127.1, 125.4, 123.0, 122.2, 122.0, 115.7, 115.4, 115.3, 115.1, 110.7, 110.6 (Ar-C), 54.2 (CH), 42.5, 28.5, 22.3( $\text{CH}_2$ ), 16.1 ( $\text{CH}_3$ ). HR MS (ESI+): Found 256.1503  $[\text{M}+\text{H}]^+$ , calcd. for  $\text{C}_{17}\text{H}_{19}\text{FN}^+$ : 256.1502.

**1-(1-(4-chlorophenyl)ethyl)-1,2,3,4-tetrahydroquinoline (6f).**  $^1\text{H}$  NMR (400 MHz,  $\text{CDCl}_3$ ):  $\delta$  7.36-7.33 (m, 4H, Ar-H), 7.08-7.02 (m, 2H, Ar-H), 6.73-6.71 (m, 1H, Ar-H), 6.67-6.63 (m, 1H, Ar-H), 5.14 (q, 1H, CH), 3.19-3.03 (m, 2H,  $\text{NCH}_2\text{C}$ ), 2.86-2.80 (m, 2H,  $\text{NCCH}_2\text{C}$ ), 1.95-1.88 (m, 2H,  $\text{NCCCH}_2$ ), 1.62 (d, 3H,  $J = 6.96$  Hz,  $\text{CH}_3$ ).  $^{13}\text{C}\{^1\text{H}\}$  NMR (100 MHz,  $\text{CDCl}_3$ ): 145.4, 141.4, 132.5, 129.4, 128.6, 128.4, 127.2, 123.0, 115.8, 110.7 (Ar-C), 54.3 (CH), 42.6, 28.5, 22.3 ( $\text{CH}_2$ ), 16.0 ( $\text{CH}_3$ ). HR MS (ESI+): Found 272.1206  $[\text{M}+\text{H}]^+$ , calcd. for  $\text{C}_{17}\text{H}_{19}\text{ClN}^+$ : 272.1206.

**1-(1-(4-bromophenyl)ethyl)-1,2,3,4-tetrahydroquinoline (6h).**  $^1\text{H}$  NMR (400 MHz,  $\text{CDCl}_3$ ):  $\delta$  7.51-7.49 (m, 1H, Ar-H), 7.40-7.39 (m, 1H, Ar-H), 7.28-7.26 (m, 2H, Ar-H), 7.09-7.04 (m, 2H, Ar-H), 6.75-6.70 (m, 2H, Ar-H), 6.66-6.62 (m, 2H, Ar-H), 5.22-5.09 (m, 1H, CH), 3.19-3.03 (m, 2H,  $\text{NCH}_2\text{C}$ ), 2.88-2.79 (m, 2H,  $\text{NCCH}_2\text{C}$ ), 1.94-1.90 (m, 2H,  $\text{NCCCH}_2$ ), 1.63 (d, 3H,  $J = 6.96$  Hz,  $\text{CH}_3$ ).  $^{13}\text{C}\{^1\text{H}\}$  NMR (100 MHz,  $\text{CDCl}_3$ ): 157.8, 141.3, 136.2, 135.9, 128.6, 127.5, 127.1, 120.6, 119.9, 118.9, 115.1 (Ar-C), 149.2, 102.3 ( $\text{CH}_2$ ), 45.7, 27.7, 22.5 ( $\text{CH}_2$ ). HR MS (ESI+): Found 316.0704  $[\text{M}+\text{H}]^+$ , calcd. for  $\text{C}_{17}\text{H}_{19}\text{BrN}^+$ : 316.0701.

**1-(1-(4-methoxyphenyl)ethyl)-1,2,3,4-tetrahydroquinoline (6i).**  $^1\text{H}$  NMR (400 MHz,  $\text{CDCl}_3$ ):  $\delta$  7.26-7.24 (m, 3H, Ar-H),  $\delta$  7.05-7.01 (m, 1H, Ar-H),  $\delta$  7.26-7.24 (m, 3H, Ar-H), 6.98-6.96 (m, 1H, Ar-H), 6.87-6.85 (m, 2H, Ar-H), 6.73-6.71 (m, 1H, Ar-

H), 6.59- 6.55 (m, 1H, Ar-H), 5.09 (q, 1H, CH), 3.79 (s, 3H, OCH<sub>3</sub>), 3.08-2.96 (m, 2H, NCH<sub>2</sub>C), 2.78-2.70 (m, 2H, NCCH<sub>2</sub>C), 1.88-1.78 (m, 2H, NCCCH<sub>2</sub>), 1.54 (d, 3H, *J* = 6.96 Hz, CH<sub>3</sub>). <sup>13</sup>C{<sup>1</sup>H} NMR (100 MHz, C<sub>6</sub>D<sub>6</sub>): 158.4, 145.7, 134.7, 129.3, 128.1, 127.1, 122.9, 115.4, 113.7, 110.7 (Ar-C), 55.3 (OCH<sub>3</sub>), 54.0 (CH), 42.3, 28.6, 22.3 (CH<sub>2</sub>), 15.3 (CH<sub>3</sub>). HR MS (ESI+): Found 268.1704 [M+H]<sup>+</sup>, calcd. for C<sub>18</sub>H<sub>22</sub>N<sup>+</sup>O: 268.1701.

**1-(1-(3,5-bis(trifluoromethyl)phenyl)ethyl)-1,2,3,4-tetrahydroquinoline (6j).**

<sup>1</sup>H NMR (400 MHz, CDCl<sub>3</sub>): δ 7.80-7.78 (m, 2H, Ar-H), 7.22-7.20 (m, 1H, Ar-H), 7.04-7.02 (m, 2H, Ar-H), 6.67-6.64 (m, 2H, Ar-H), 5.19 (q, 1H, CH), 3.16-2.91 (m, 1H, NCH<sub>2</sub>C), 2.85-2.75 (m, 2H, NCCH<sub>2</sub>C), 1.90-1.87 (m, 2H, NCCCH<sub>2</sub>), 1.63 (d, 3H, *J* = 6.96 Hz, CH<sub>3</sub>). <sup>13</sup>C{<sup>1</sup>H} NMR (100 MHz, C<sub>6</sub>D<sub>6</sub>): 146.6, 146.1, 145.0, 129.8, 129.7, 127.6, 127.3, 127.1, 123.5, 121.0, 116.8, 110.8 (Ar-C), 54.6 (CH), 42.8, 28.3, 22.2 (CH<sub>2</sub>), 15.6 (CH<sub>3</sub>). HR MS (ESI+): Found 374.1346 [M+H]<sup>+</sup>, calcd. for C<sub>19</sub>H<sub>18</sub>F<sub>6</sub>N<sup>+</sup>: 374.1343.

**1-(1-(pyridin-2-yl)vinyl)-1,2,3,4-tetrahydroquinoline (6k).**

<sup>1</sup>H NMR (400 MHz, CDCl<sub>3</sub>): δ 8.42 (s, 1H, Ar-H), 8.21 (d, 1H, *J* = 13.52 Hz CH<sub>2</sub>), 7.49-7.45 (m, 1H, Ar-H), 7.16 (d, 1H, *J* = 3.68 Hz Ar-H), 7.04-7.02 (m, 2H, Ar-H), 6.87-6.83 (m, 2H, Ar-H), 5.72 (d, 1H, *J* = 13.48 Hz CH<sub>2</sub>), 3.58-3.55 (m, 2H, NCH<sub>2</sub>C), 2.71-2.68 (m, 2H, NCCH<sub>2</sub>C), 2.05-1.96 (m, 2H, NCCCH<sub>2</sub>). <sup>13</sup>C{<sup>1</sup>H} NMR (100 MHz, CDCl<sub>3</sub>): 147.8, 129.4, 128.4, 126.4, 116.8, 113.2 (Ar-C), 48.5 (CH), 37.1 (CHCH<sub>2</sub>CH<sub>2</sub>), 28.5 (CHCH<sub>2</sub>CH<sub>2</sub>), 22.9 (CHCH<sub>2</sub>CH<sub>2</sub>), 20.9 (CHCH<sub>2</sub>CH<sub>2</sub>), 14.3 (CH<sub>3</sub>). HR MS (ESI+): Found 237.1390 [M+H]<sup>+</sup>, calcd. for C<sub>16</sub>H<sub>17</sub>N<sub>2</sub><sup>+</sup>: 237.1392.



**1-(1-(thiophen-2-yl)ethyl)-1,2,3,4-tetrahydroquinoline (6l).**  $^1\text{H}$  NMR (400 MHz,  $\text{CDCl}_3$ ):  $\delta$  7.53-7.52(m, 1H, Ar-H), 7.43-7.41 (m, 1H, Ar-H), 7.33-7.14 (m, 2H, Ar-H), 6.84-6.82 (m, 2H, Ar-H), 6.67-6.65 (m, 1H, Ar-H), 5.36 (m, 1H, CH), 3.16-3.13 (m, 2H,  $\text{NCH}_2\text{C}$ ), 2.80-2.75(s, 2H,  $\text{NCCH}_2\text{C}$ ), 1.91-1.87 (m, 2H,  $\text{NCCCH}_2$ ), 1.65 (d, 3H,  $J = 6.96$  Hz,  $\text{CH}_3$ ).  $^{13}\text{C}\{^1\text{H}\}$  NMR (100 MHz,  $\text{CDCl}_3$ ): 146.6, 131.1, 129.8, 129.4, 128.3, 127.6, 127.1, 126.6, 125.9, 124.8, 124.1, 116.2, 111.1 (Ar-C), 51.8 (CH), 42.2, 28.4, 22.2 ( $\text{CH}_2$ ), 16.9 ( $\text{CH}_3$ ). HR MS (ESI+): Found 244.1157  $[\text{M}+\text{H}]^+$ , calcd. for  $\text{C}_{15}\text{H}_{18}\text{NS}^+$ : 244.1160.

**1-(1-phenylpropan-2-yl)-1,2,3,4-tetrahydroquinoline (6m).**  $^1\text{H}$  NMR (400 MHz,  $\text{CDCl}_3$ ):  $\delta$  7.30 -7.25(m, 2H, Ar-H), 7.21-7.16 (m, 4H, Ar-H), 7.07-7.03 (m, 1H, Ar-H), 6.95-6.93 (m, 1H, Ar-H), 6.76-6.74 (m, 1H, Ar-H), 6.60-6.58 (m, 1H, Ar-H), 4.23-4.14 (m, 1H, CH), 3.24-3.17 (m, 2H,  $\text{NCH}_2\text{C}$ ), 3.00-2.97 (m, 1H,  $\text{ArCH}_2$ ), 2.75-2.71(m, 2H,  $\text{NCCH}_2\text{C}$ ), 2.73-2.71 (m, 1H,  $\text{ArCH}_2$ ), 1.93-1.87 (m, 2H,  $\text{NCCCH}_2$ ), 1.18 (d, 3H,  $J = 6.60$  Hz,  $\text{CH}_3$ ).  $^{13}\text{C}\{^1\text{H}\}$  NMR (100 MHz,  $\text{CDCl}_3$ ): 145.5, 139.8, 129.4, 129.1, 128.4, 127.1, 126.1, 123.3, 115.4, 110.7 (Ar-C), 53.3 (CH), 41.2, 39.3, 28.5, 22.4 ( $\text{CH}_2$ ), 16.4( $\text{CH}_3$ ). HR MS (ESI+): Found 252.1758  $[\text{M}+\text{H}]^+$ , calcd. for  $\text{C}_{18}\text{H}_{22}\text{N}^+$ : 252.1752.

**1-(hexan-2-yl)-1,2,3,4-tetrahydroquinoline (6n).**  $^1\text{H}$  NMR (400 MHz,  $\text{CDCl}_3$ ):  $\delta$  7.05-7.02 (m, 1H, Ar-H), 6.95-6.93 (m, 1H, Ar-H), 6.68-6.66(m, 1H, Ar-H), 6.54-6.51 (m, 1H, Ar-H), 3.93-3.84 (m, 1H, CH), 3.12-3.09 (m, 2H,  $\text{NCH}_2\text{C}$ ), 2.73-2.71 (m, 2H,  $\text{NCCH}_2\text{C}$ ), 1.90-1.88 (m, 2H,  $\text{NCCCH}_2$ ), 1.63-1.58 (m, 2H  $\text{CH}_2$ ), 1.45-1.39 (m, 2H  $\text{CH}_2$ ), 1.29-1.23 (m, 2H  $\text{CH}_2$ ), 1.11 (d, 3H,  $J = 6.56$ Hz,  $\text{CH}_3$ ), 0.90-0.87 (m, 3H

CH<sub>3</sub>). <sup>13</sup>C{<sup>1</sup>H} NMR (100 MHz, CDCl<sub>3</sub>): 146.0, 129.3, 127.0, 122.9, 114.9, 110.5 (Ar-C), 51.2 (CH), 40.3, 33.7, 29.1, 28.6, 22.8, 22.4 (CH<sub>2</sub>), 16.4, 14.2(CH<sub>3</sub>). HR MS (ESI+): Found 218.1904 [M+H]<sup>+</sup>, calcd. for C<sub>15</sub>H<sub>24</sub>N<sup>+</sup>: 218.1909.

**1-(1-phenylethyl)indoline (7d).** <sup>1</sup>H NMR (400 MHz, CDCl<sub>3</sub>): δ 7.44-7.43 (m, 2H, Ar-H), 7.38-7.34 (m, 2H, Ar-H), 7.29-7.28 (m, 1H, Ar-H), 7.08-7.07 (m, 1H, Ar-H), 6.99-6.98 (m, 1H, Ar-H), 6.62-6.60 (m, 1H, Ar-H), 6.39-6.37 (m, 1H, Ar-H), 4.75 (q, 1H, CH), 3.41-3.32 (m, 2H, CH<sub>2</sub>), 2.99-2.95 (m, 2H, CH<sub>2</sub>), 1.56 (d, 3H, *J* = 6.96 Hz, CH<sub>3</sub>). <sup>13</sup>C{<sup>1</sup>H} NMR (100 MHz, CDCl<sub>3</sub>): 146.6, 131.1, 129.8, 128.4, 127.6, 127.1, 126.9, 124.4, 116.9, 107.2 (Ar-C), 54.6 (CH), 48.0, 28.2 (CH<sub>2</sub>), 17.8 (CH<sub>3</sub>). HR MS (ESI+): Found 224.1940 [M+H]<sup>+</sup>, calcd. for C<sub>16</sub>H<sub>18</sub>N<sup>+</sup>: 224.1939.

**4-(1-phenylethyl)-3,4-dihydro-2H-benzo[b][1,4]oxazine (7e).** <sup>1</sup>H NMR (400 MHz, CDCl<sub>3</sub>): δ 7.37-7.35 (m, 4H, Ar-H), 7.33-7.31 (m, 1H, Ar-H), 6.82-6.80 (m, 2H, Ar-H), 6.64-6.59 (m, 1H, Ar-H), 5.11 (q, 1H, CH), 4.17-4.07 (m, 2H, OCH<sub>2</sub>), 3.22-3.00 (m, 2H, NCH<sub>2</sub>), 1.55(d, 3H, *J* = 6.92 Hz, CH<sub>3</sub>). <sup>13</sup>C{<sup>1</sup>H} NMR (100 MHz, CDCl<sub>3</sub>): 144.2, 141.8, 135.1, 128.6, 127.2, 121.6, 117.3, 116.5, 112.2 (Ar-C), 64.9 (CH), 54.5, 40.5 (CH<sub>2</sub>), 15.0 (CH<sub>3</sub>). HR MS (ESI+): Found 240.1381 [M+H]<sup>+</sup>, calcd. for C<sub>16</sub>H<sub>18</sub>NO<sup>+</sup>: 240.1388.

**2-methyl-1-(1-phenylethyl)-1,2,3,4-tetrahydroquinoline (7f).** <sup>1</sup>H NMR (400 MHz, CDCl<sub>3</sub>): δ 7.47-7.34 (m, 1H, Ar-H), 7.37-7.28 (m, 1H, Ar-H), 7.05 (m, 2H, Ar-H), 6.47 (m, 1H, Ar-H), 6.62 (m, 1H, Ar-H), 5.51 (q, 1H, CH), 3.63-3.40 (m, 1H, CH), 2.92-2.69 (m, 2H, CH<sub>2</sub>), 1.72-1.65 (d, 3H, *J* = 7.04 Hz, CH<sub>3</sub>), 1.17-1.15 (d, 3H, *J* = 6.52 Hz, CH<sub>3</sub>). <sup>13</sup>C{<sup>1</sup>H} NMR (100 MHz, CDCl<sub>3</sub>): 144.1, 143.9, 143.2, 142.9, 129.5,

128.3, 127.3, 127.1, 126.8, 126.1, 122.4, 121.9, 115.9, 115.3, 114.0, 112.7 (Ar-C), 57.6, 56.1 (CH), 48.6, 47.0 (CH), 27.4, 27.2 (CH<sub>2</sub>), 20.1, 19.6 (CH<sub>3</sub>), 17.4, 16.3 (CH<sub>3</sub>). HR MS (ESI+): Found 252.1751 [M+H]<sup>+</sup>, calcd. for C<sub>18</sub>H<sub>22</sub>N<sup>+</sup>: 252.1752.

**2-methyl-1-(1-phenylethyl)indoline (7g).** <sup>1</sup>H NMR (400 MHz, CDCl<sub>3</sub>): δ 7.50-7.43 (m, 2H, Ar-H), 7.33-7.30 (m, 2H, Ar-H), 7.25-7.22 (m, 1H, Ar-H), 7.03-6.80 (m, 2H, Ar-H), 6.61-6.55 (s, 1H, Ar-H), 6.36-6.01 (m, 1H, Ar-H), 4.78-4.53 (q, 1H, CH), 4.06-3.78 (m, 1H, CH), 3.28-2.59 (m, 2H, CH<sub>2</sub>), 1.63-1.55 (d, 3H, *J* = 7.12 Hz, CH<sub>3</sub>), 1.38-1.04 (d, 3H, *J* = 6.12 Hz, CH<sub>3</sub>). <sup>13</sup>C{<sup>1</sup>H} NMR (100 MHz, CDCl<sub>3</sub>): 151.6, 150.0, 144.1, 143.0, 128.4, 128.3, 127.3, 127.1, 126.9, 126.7, 124.2, 117.1, 116.7, 109.2, 107.1 (Ar-C), 58.2, 56.8, 54.5, 53.5 (CH), 37.9, 37.5 (CH<sub>2</sub>), 22.8, 20.9 (CH<sub>3</sub>), 16.3, 13.9 (CH<sub>3</sub>).

**2-phenyl-1-(1-phenylethyl)indoline (7h).** <sup>1</sup>H NMR (400 MHz, CDCl<sub>3</sub>): δ 7.50-7.38 (m, 1H, Ar-H), 7.38-7.34 (m, 2H, Ar-H), 7.32-7.26 (m, 3H, Ar-H), 7.26-7.23 (m, 5H, Ar-H), 7.05-7.01 (m, 2H, Ar-H), 6.96-6.86 (m, 2H, Ar-H), 6.64 (m, 2H, Ar-H), 6.44-6.10 (m, 1H, Ar-H), 4.88-4.72 (t, 1H, CH), 4.88-4.72 (t, 1H, CH), 4.48-4.36 (q, 1H, CH), 3.48-2.94 (m, 2H, CH<sub>2</sub>), 1.51-1.45 (d, 3H, *J* = 6.96 Hz, CH<sub>3</sub>). <sup>13</sup>C{<sup>1</sup>H} NMR (100 MHz, CDCl<sub>3</sub>): 115.7, 146.7, 145.0, 143.2, 138.5, 131.1, 128.6, 128.4, 128.3, 128.2, 127.6, 127.5, 127.4, 127.3, 127.1, 127.0, 126.8, 126.6, 126.0, 124.2, 124.0, 117.8, 117.4, 109.6, 108.5 (Ar-C), 68.0, 67.7, 58.6, 57.0 (CH), 40.4, 39.7 (CH<sub>2</sub>), 20.6 (CH<sub>3</sub>). HR MS (ESI+): Found 238.1590 [M+H]<sup>+</sup>, calcd. For C<sub>17</sub>H<sub>20</sub>N<sup>+</sup>: 238.1596.

**5-methyl-1-(1-phenylethyl)indoline (7i).** <sup>1</sup>H NMR (400 MHz, CDCl<sub>3</sub>): δ 7.42-

7.40 (m, 2H, Ar-H), 7.32-7.30 (m, 2H, Ar-H), 6.89 (s, 1H, Ar-H), 6.79-6.77 (m, 1H, Ar-H), 6.25-6.23 (m, 1H, Ar-H), 4.64 (q, 1H, CH), 3.32-3.27 (m, 2H, CH<sub>2</sub>), 3.92-2.88 (m, 2H, CH<sub>2</sub>), 2.22(s, 3H, ArCH<sub>3</sub>), 1.51 (d, 3H,  $J = 6.96$  Hz, CH<sub>3</sub>). <sup>13</sup>C{<sup>1</sup>H} NMR (100 MHz, CDCl<sub>3</sub>): 149.4, 146.7, 143.2, 131.2, 130.6, 129.9, 128.4, 128.0, 127.6, 127.2, 126.9, 126.4, 126.0, 125.4, 117.4 (Ar-C), 55.1 (CH), 48.5, 28.4 (CH<sub>2</sub>), 20.7, 16.7(CH<sub>3</sub>). HR MS (ESI+): Found 238.1593 [M+H]<sup>+</sup>, calcd. for C<sub>17</sub>H<sub>20</sub>N<sup>+</sup>: 238.1596.

**5-bromo-1-(1-phenylethyl)indoline (7j).** <sup>1</sup>H NMR (400 MHz, CDCl<sub>3</sub>):  $\delta$  7.41-7.39 (m, 2H, Ar-H), 7.34-7.31 (m, 3H, Ar-H), 7.04-7.02 (m, 1H, Ar-H), 7.01-7.00 (m, 1H, Ar-H), 6.36-6.34 (m, 1H, Ar-H), 4.71 (q, 1H, CH), 3.34-3.27 (m, 2H, CH<sub>2</sub>), 2.98-2.92 (m, 2H, CH<sub>2</sub>), 1.52 (d, 3H,  $J = 6.96$  Hz, CH<sub>3</sub>). <sup>13</sup>C{<sup>1</sup>H} NMR (100 MHz, CDCl<sub>3</sub>): 142.9, 137.0, 129.5, 128.4, 128.3, 127.2, 127.1, 126.9, 124.4, 117.0, 107.2 (Ar-C), 54.5 (CH), 48.0, 28.2 (CH<sub>2</sub>), 16.5 (CH<sub>3</sub>). HR MS (ESI+): Found 302.0539 [M+H]<sup>+</sup>, calcd. for C<sub>16</sub>H<sub>17</sub>BrN<sup>+</sup>: 302.0544.

# $^1\text{H}$ and $^{13}\text{C}$ NMR spectra of complex 3 and hydroamination products

## Complex 3

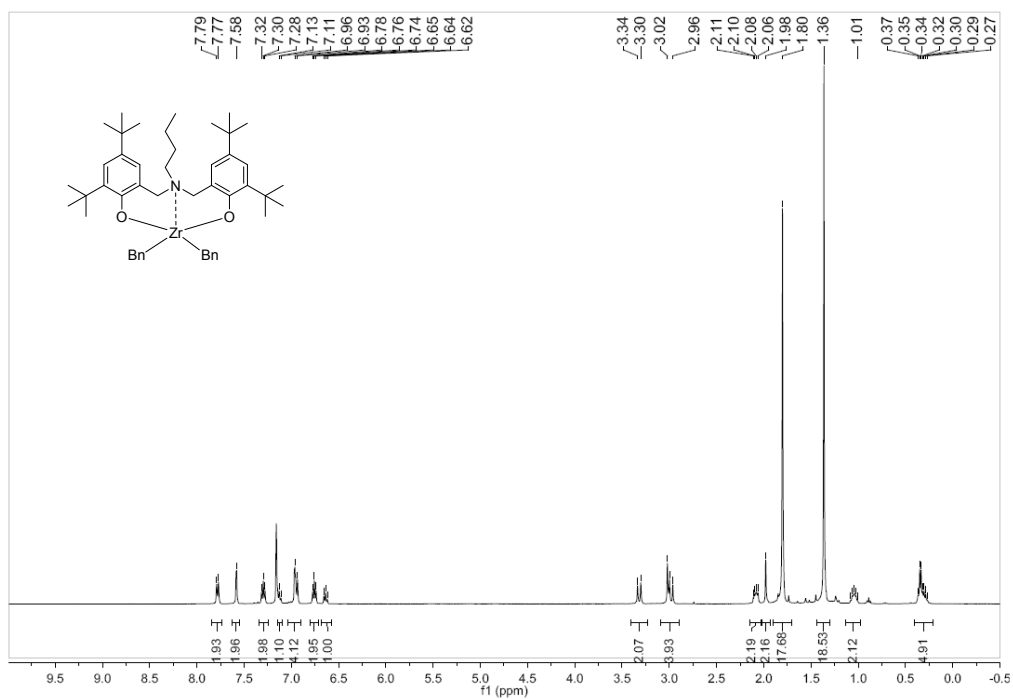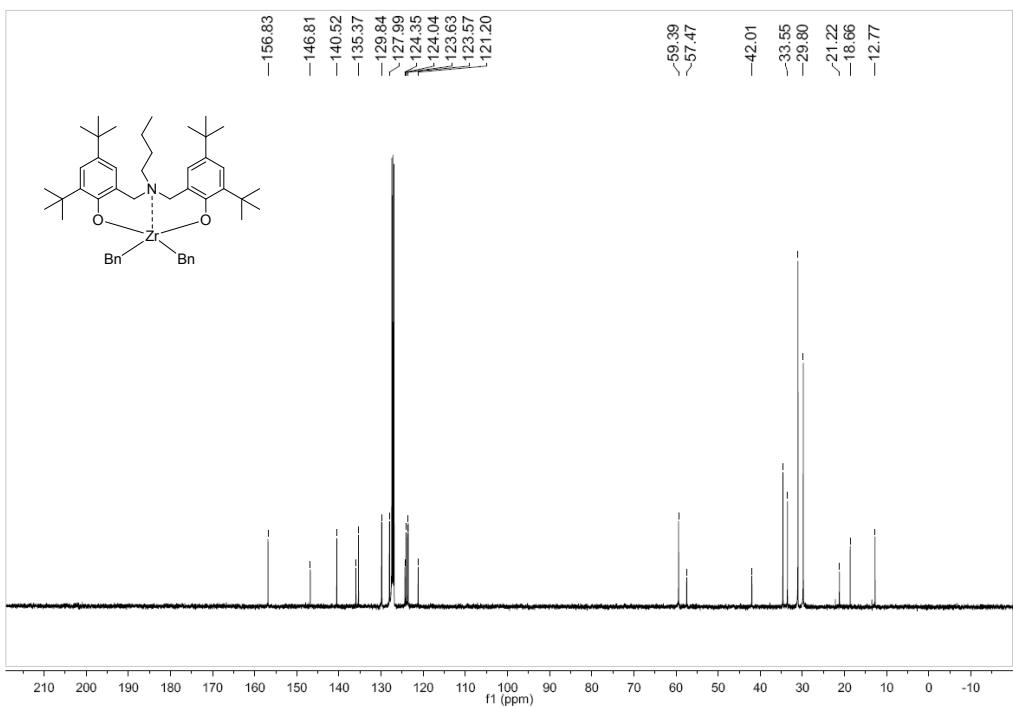

6a

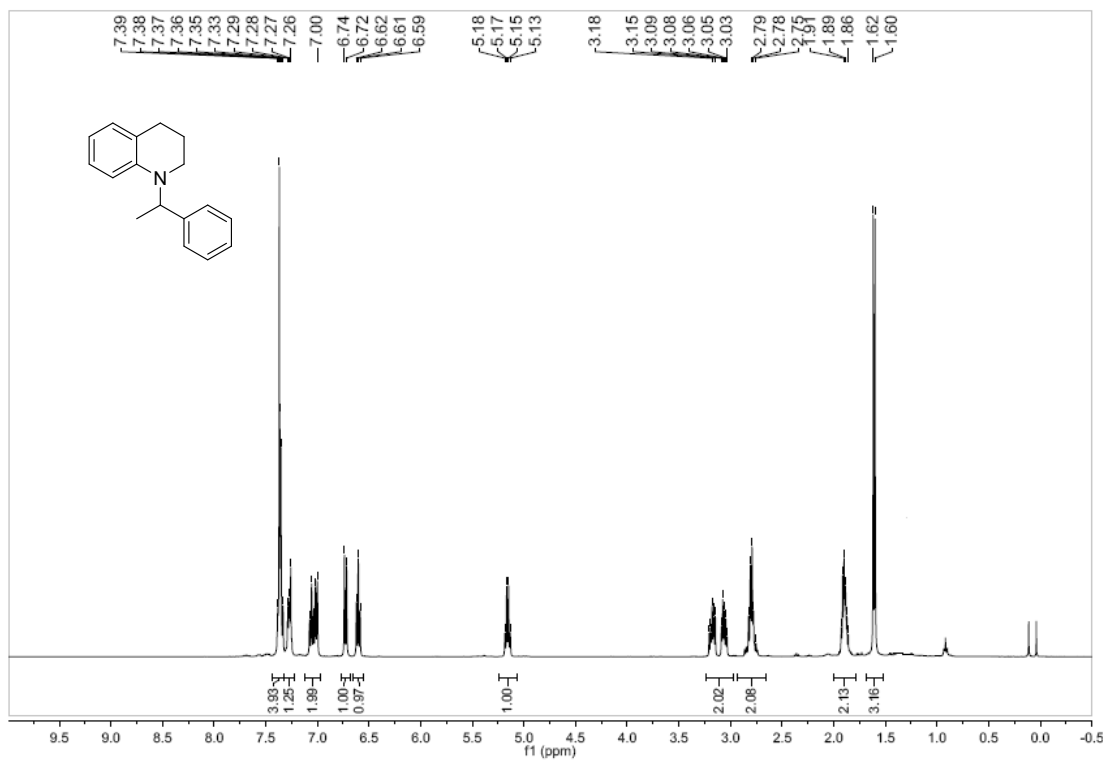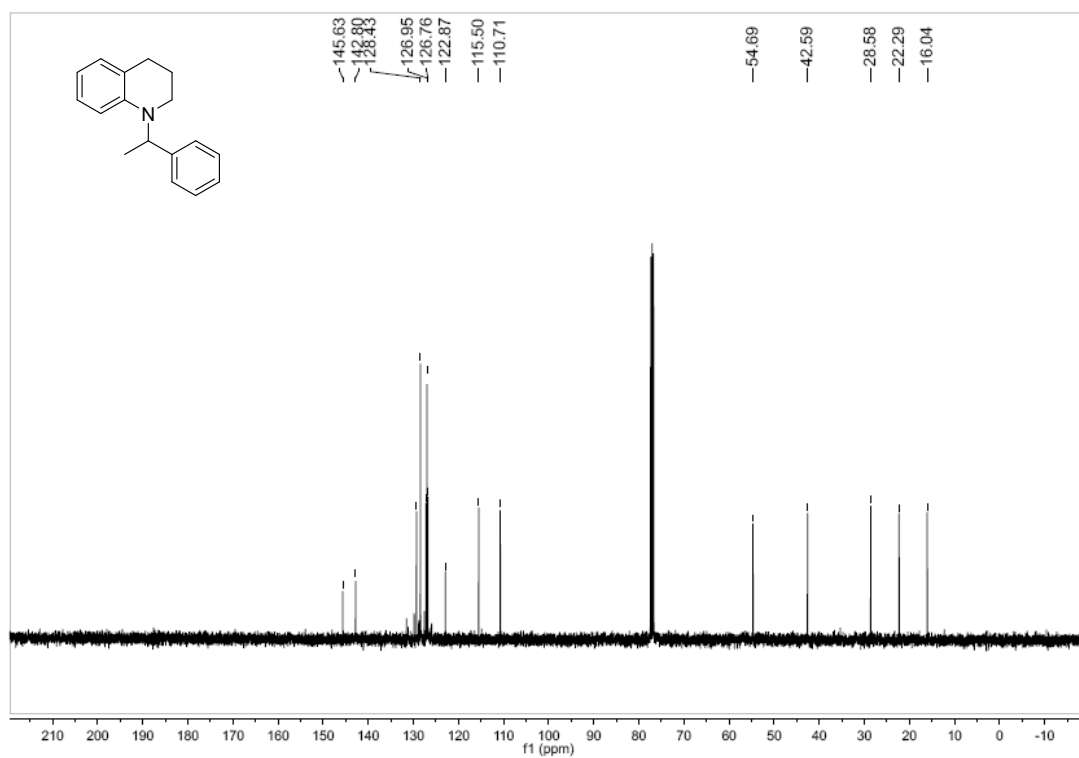

6b

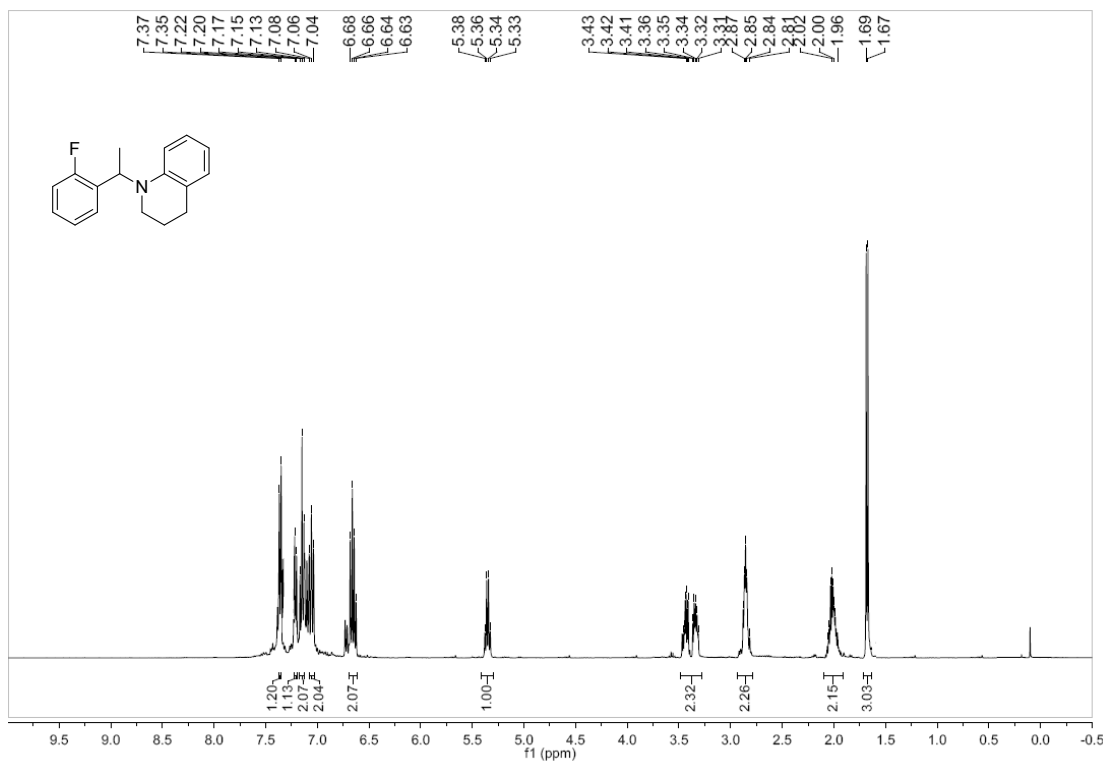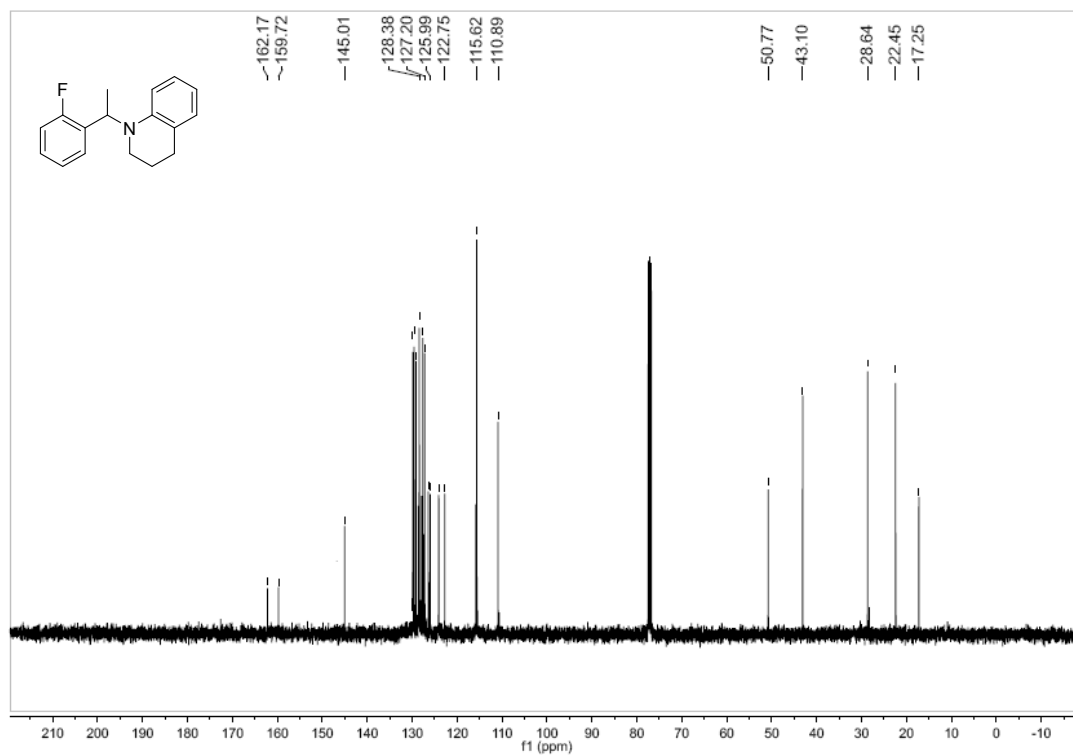

6c

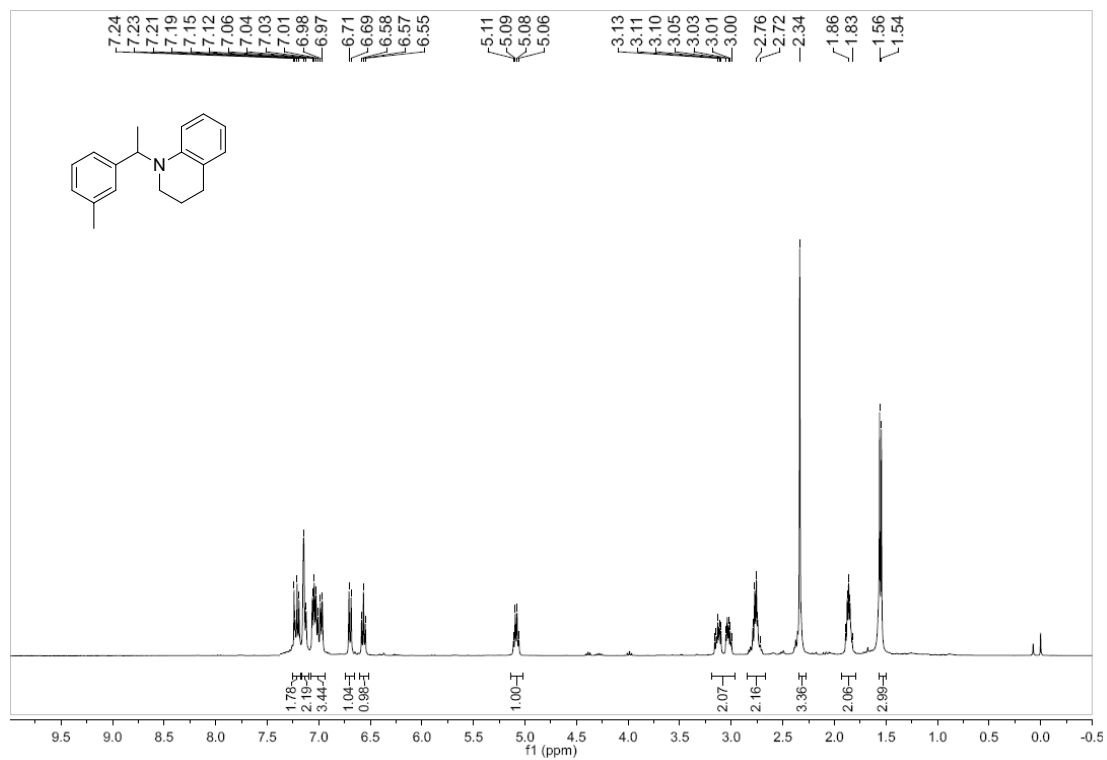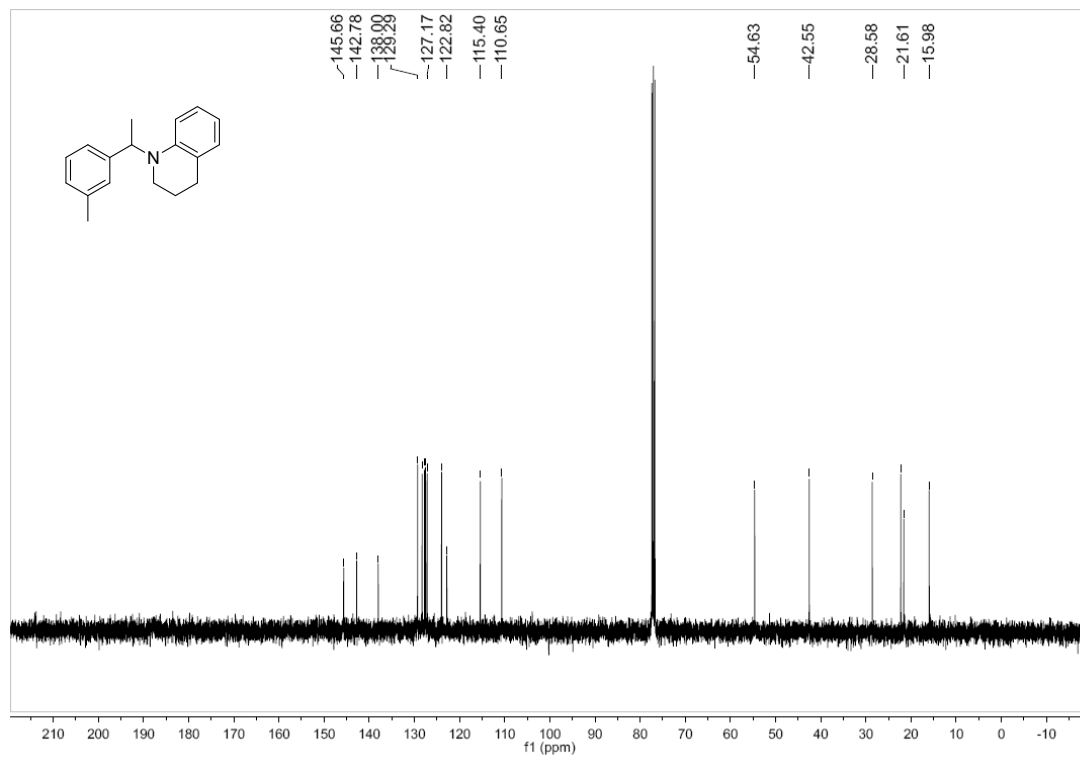



6d

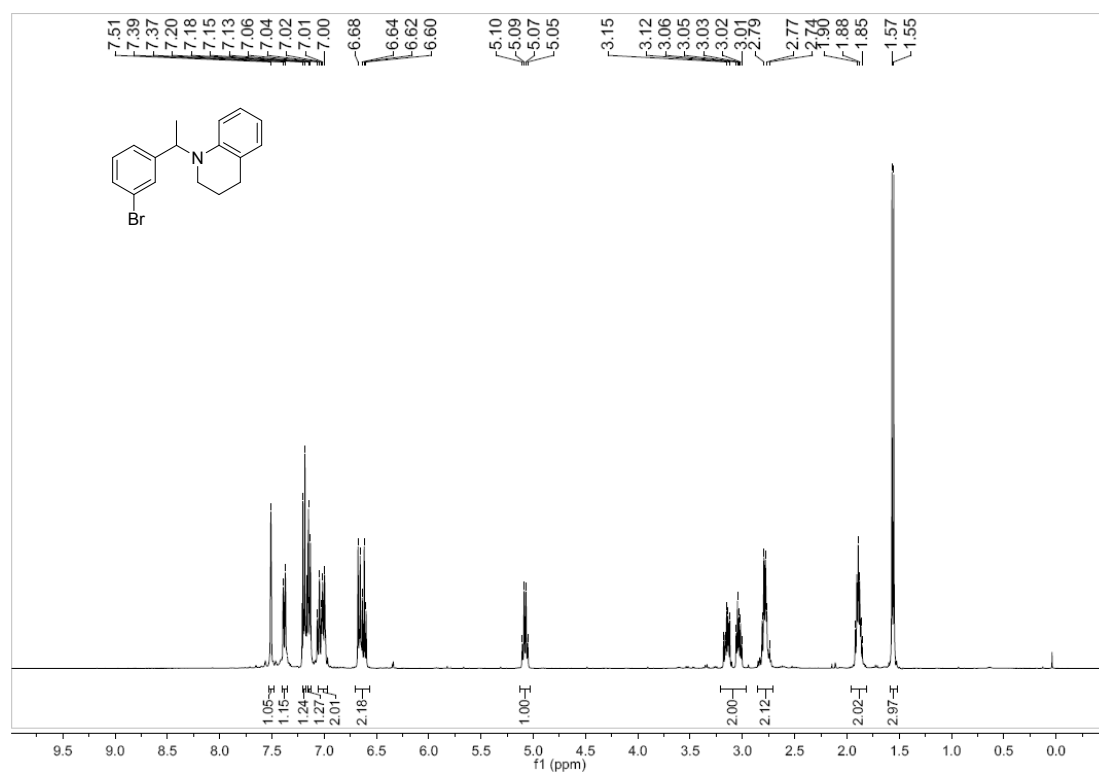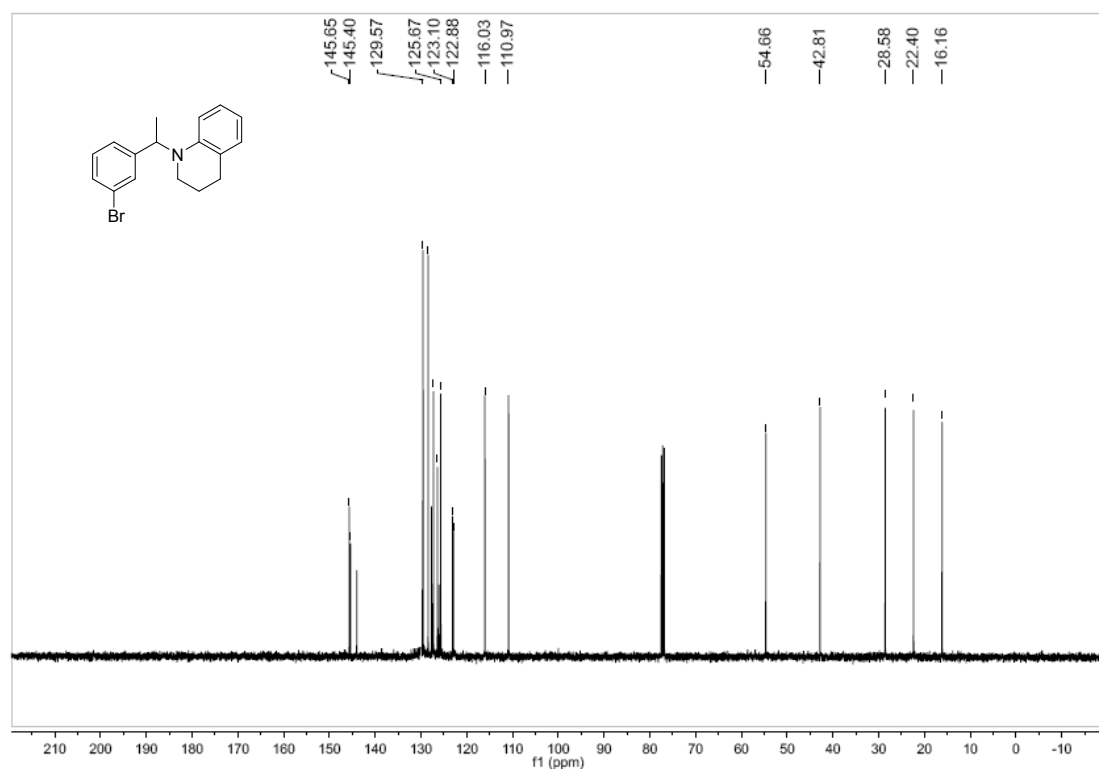

6e

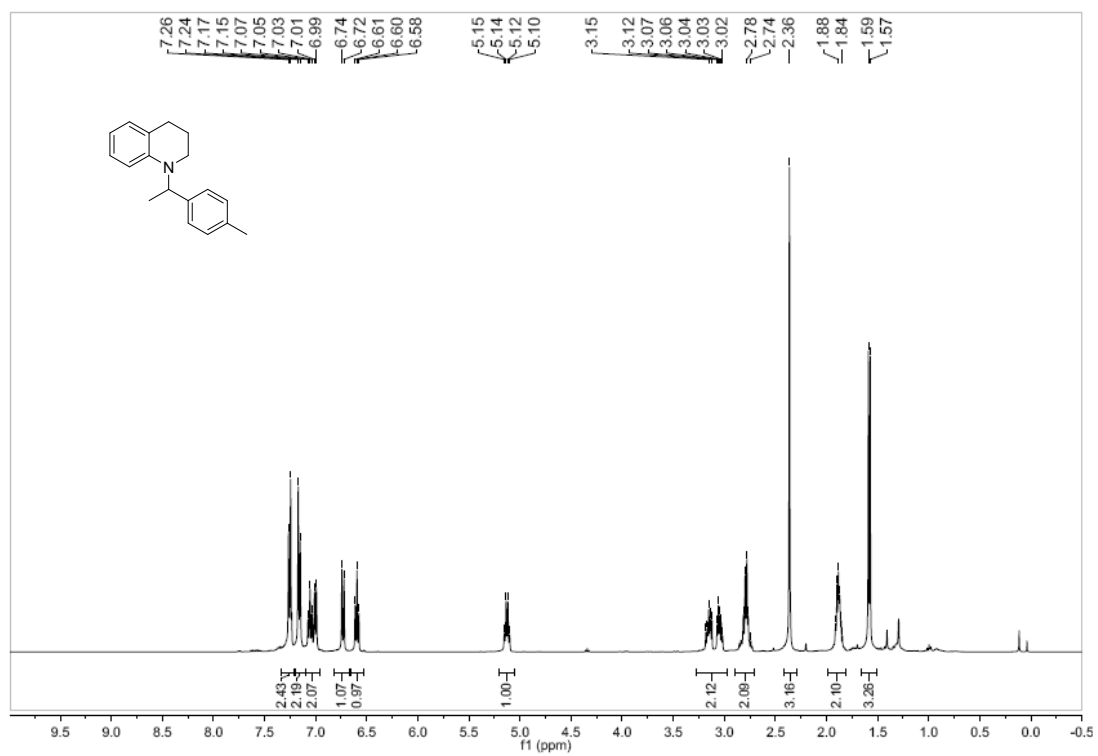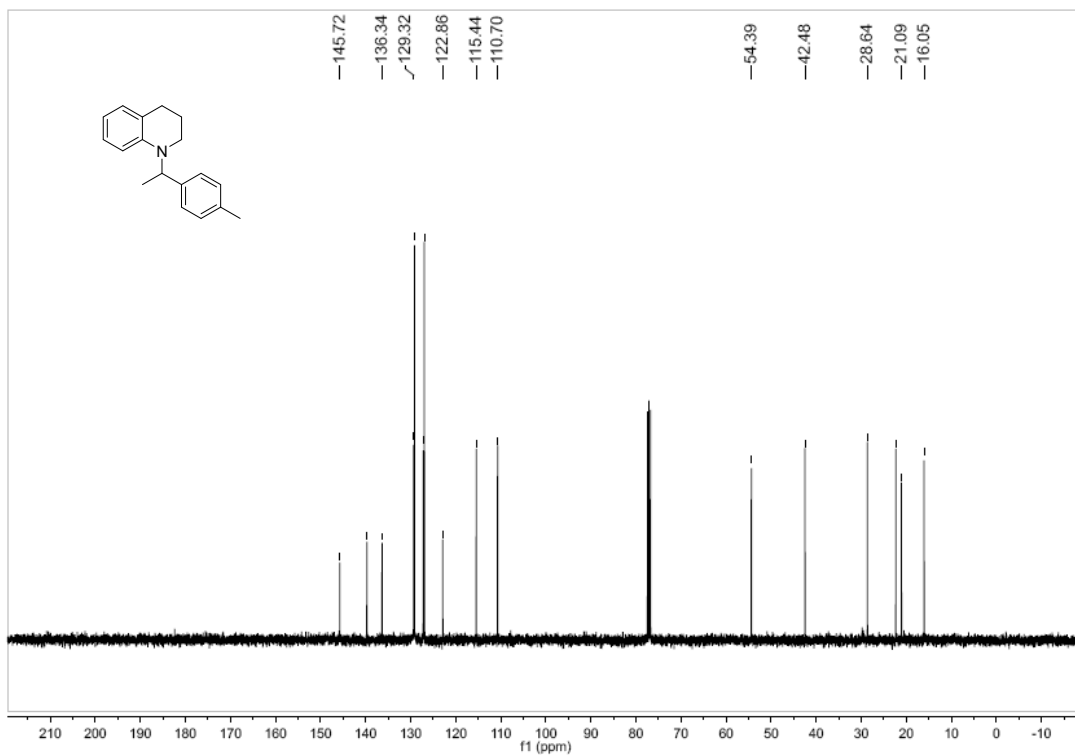

6f

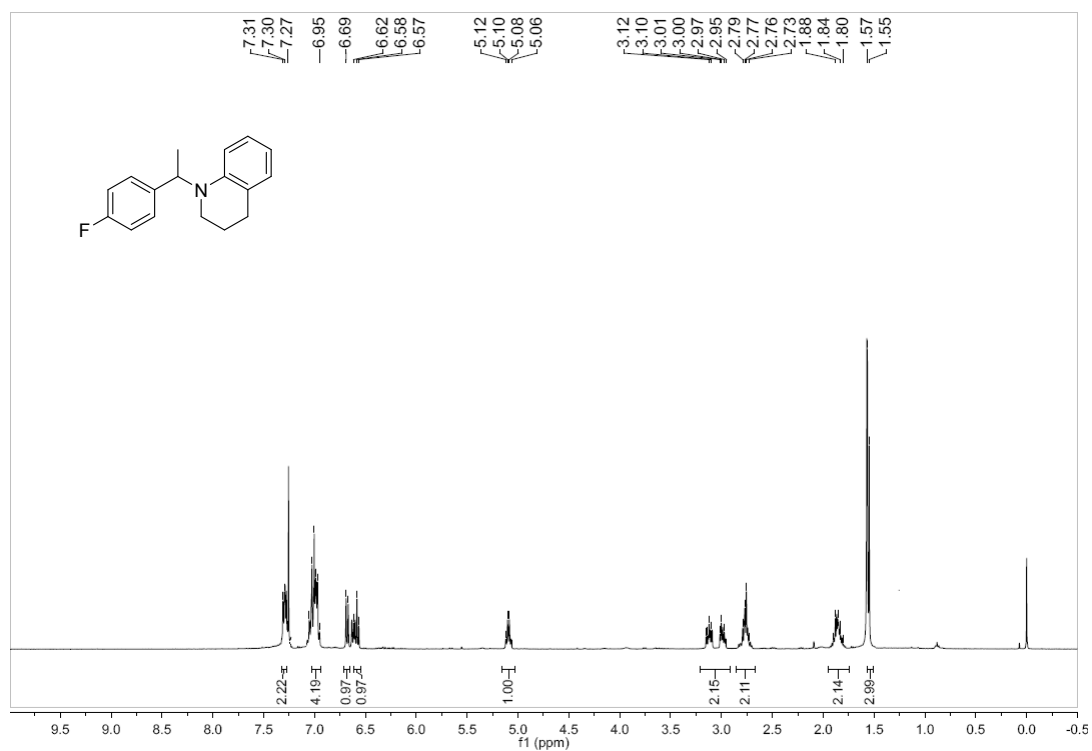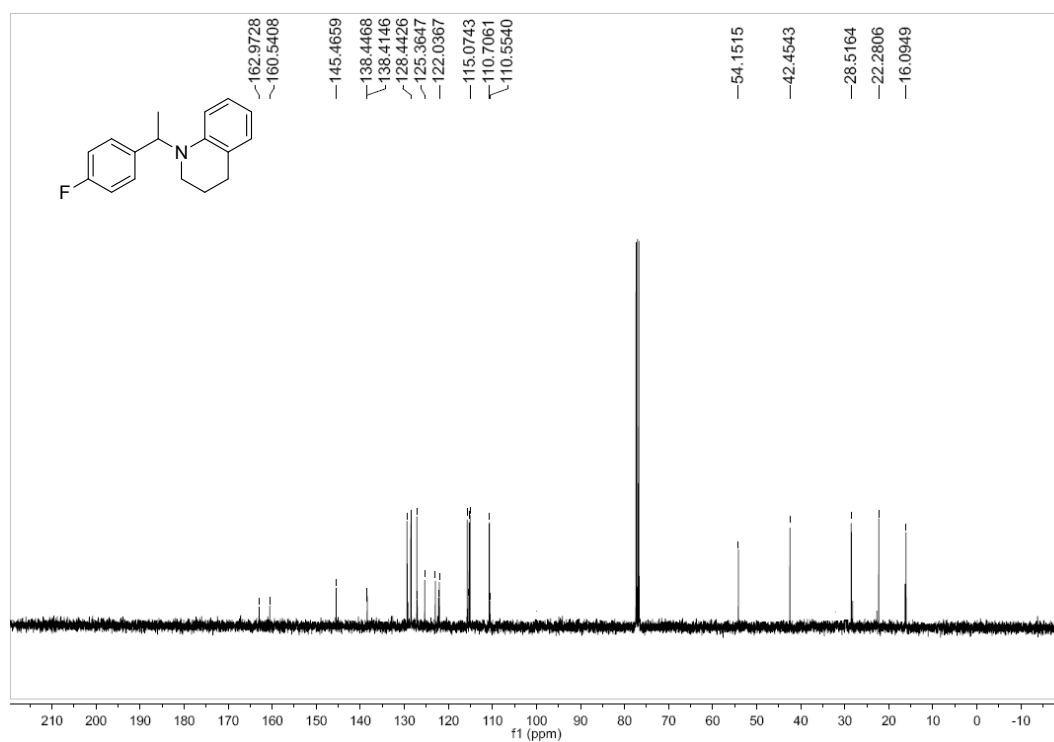

6g

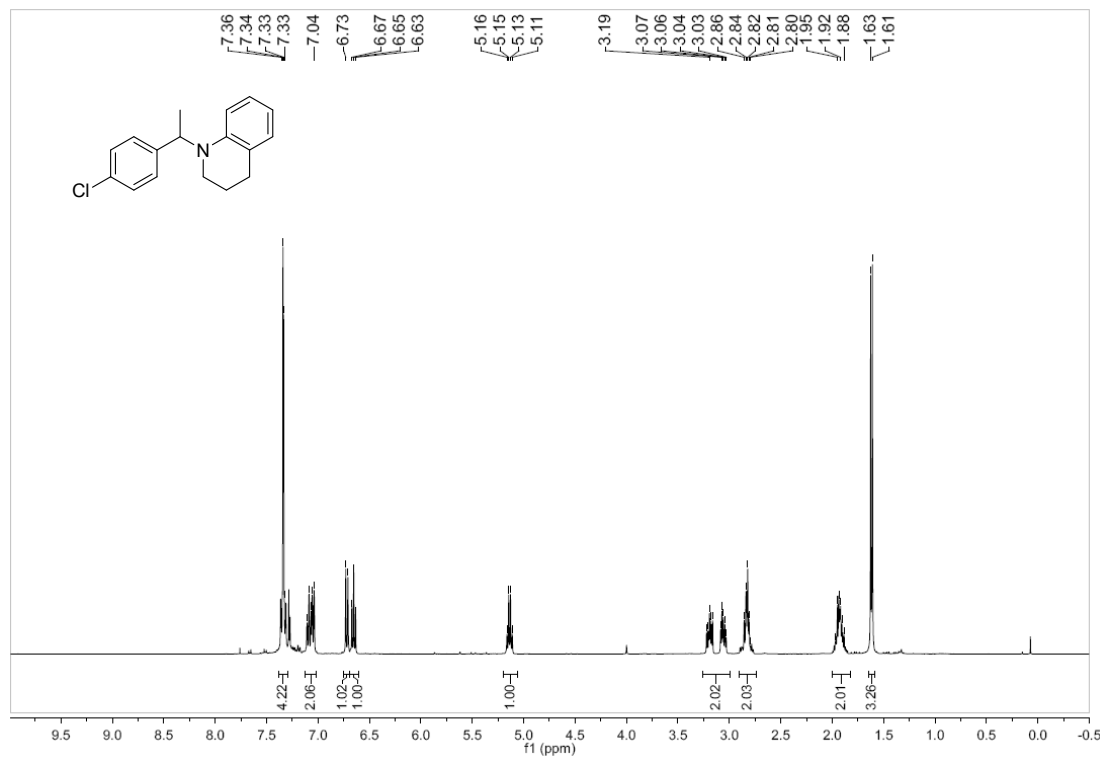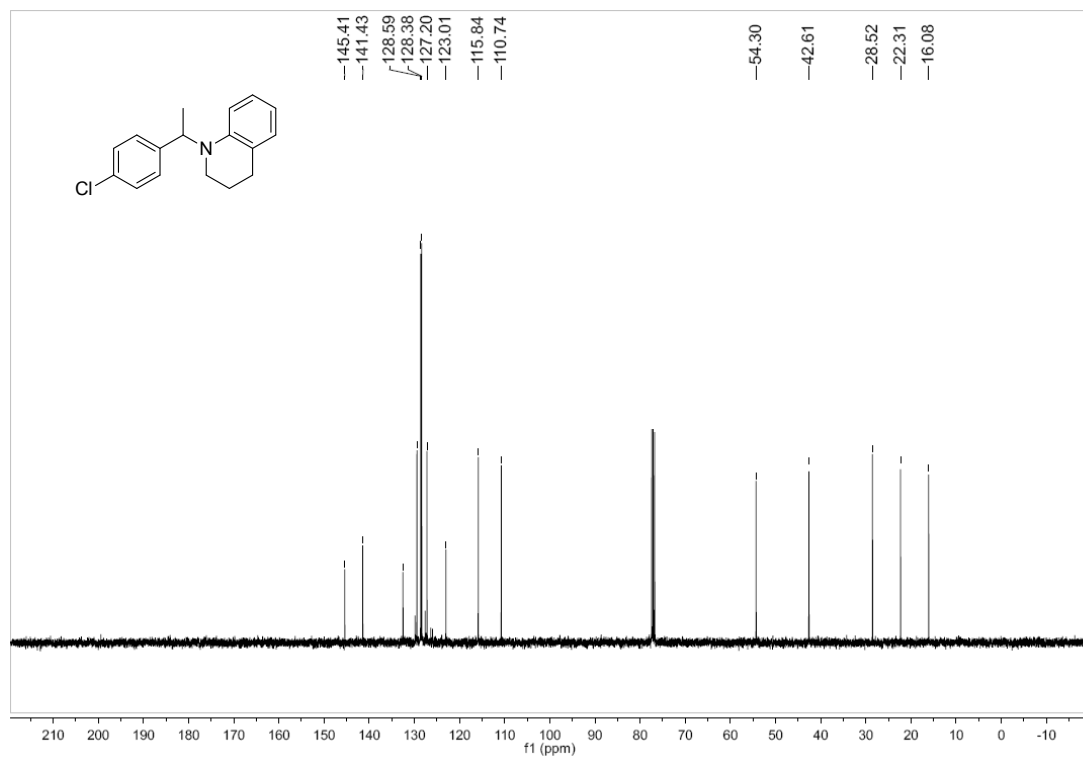

6h

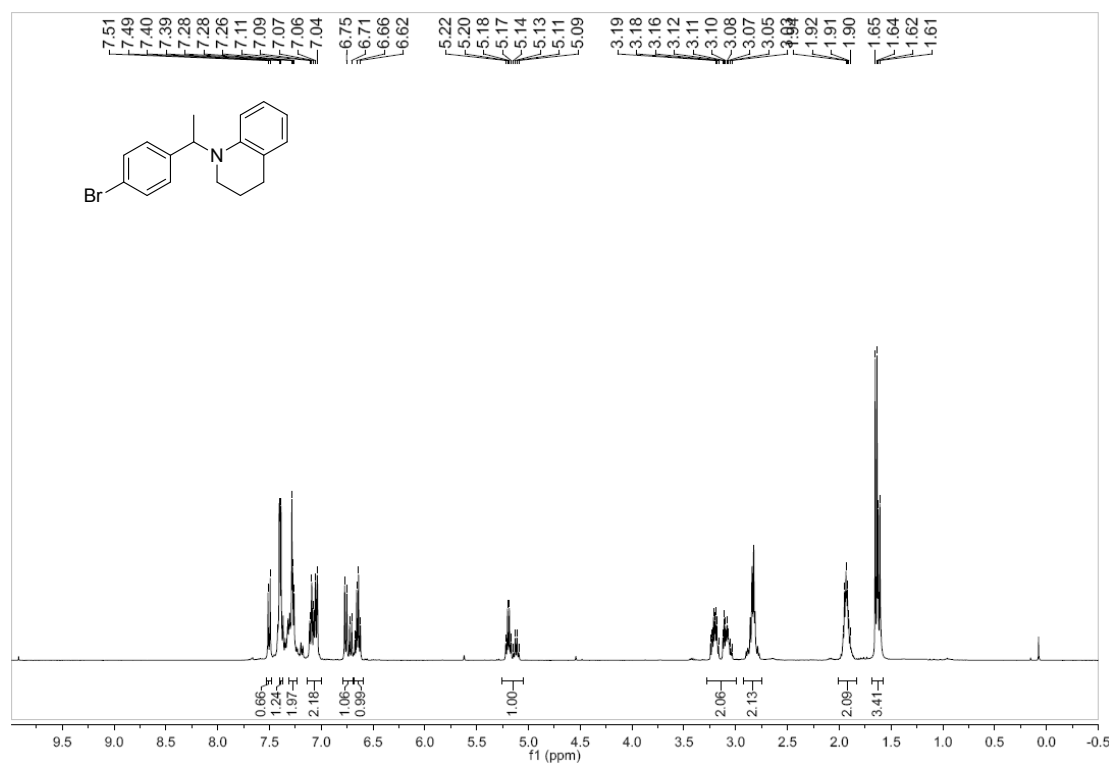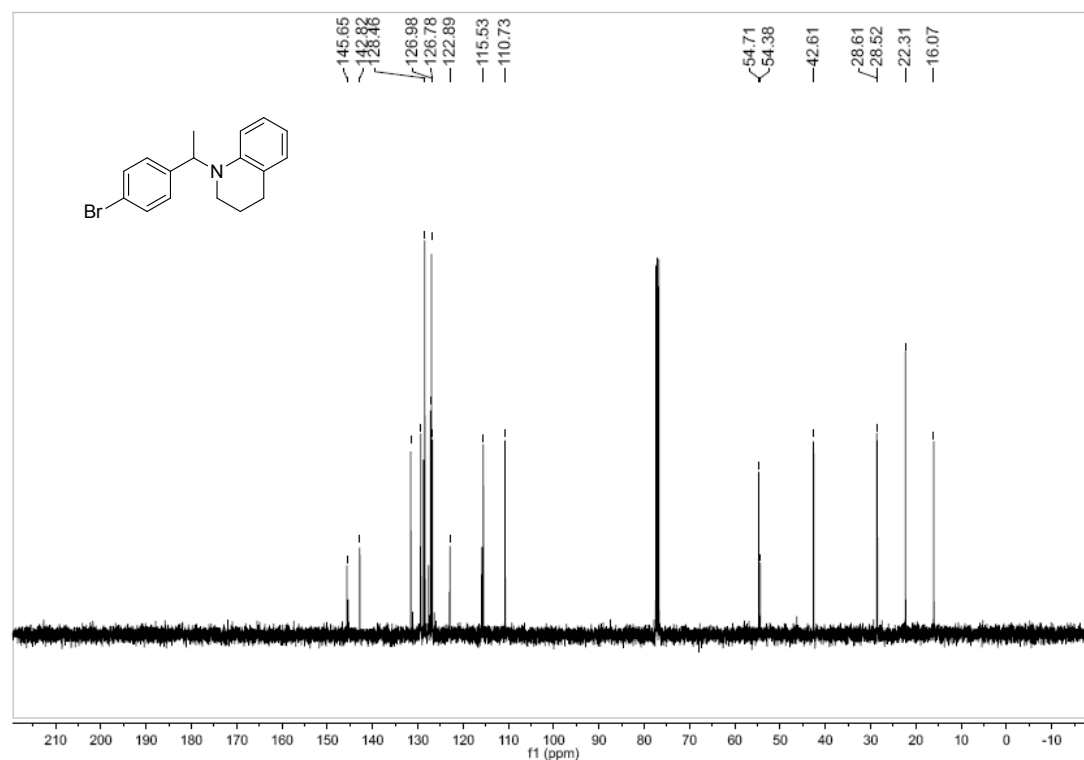

6i

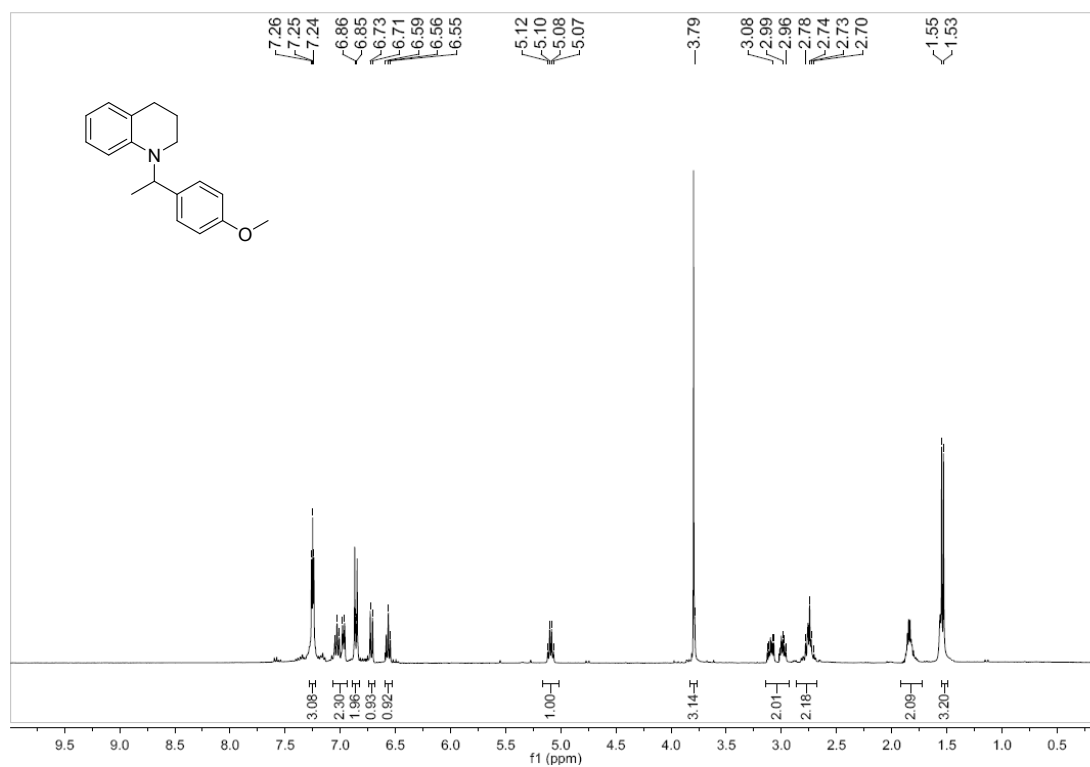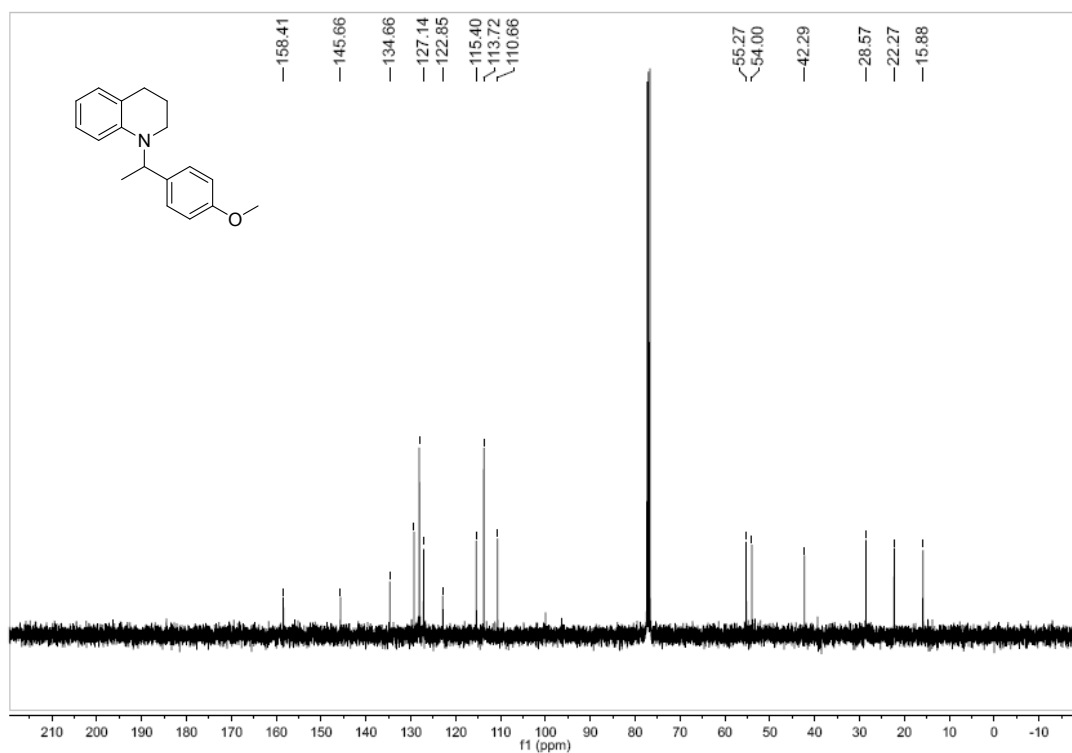

6j

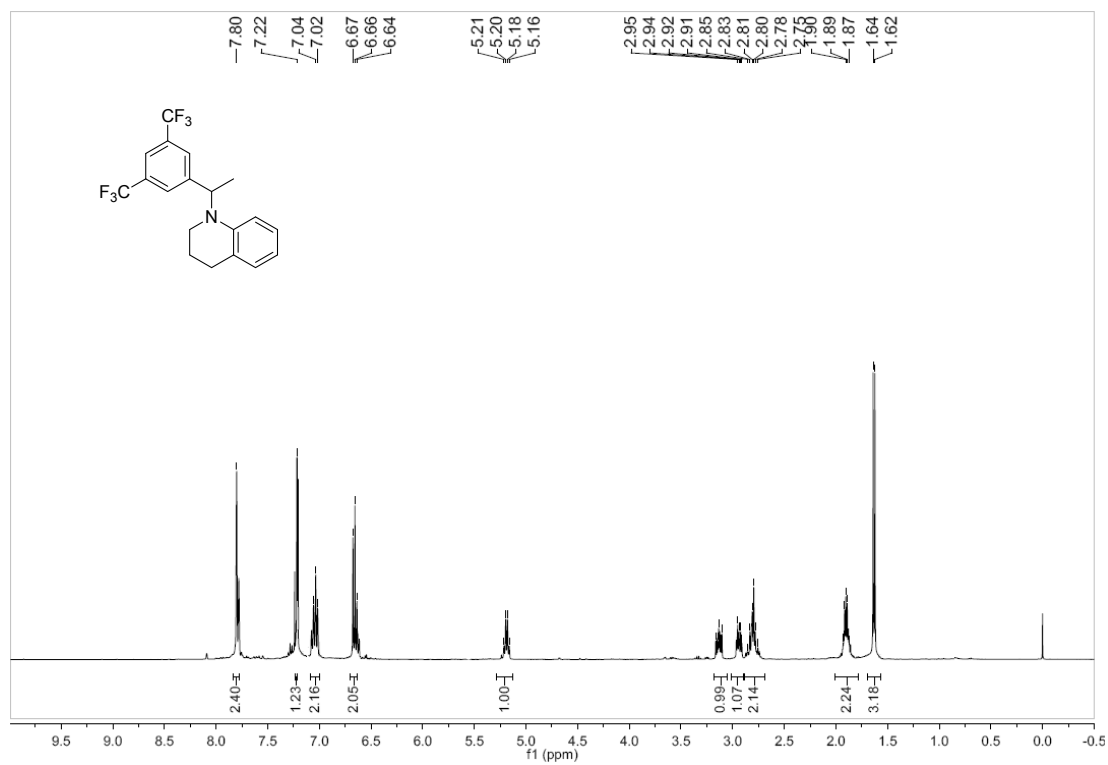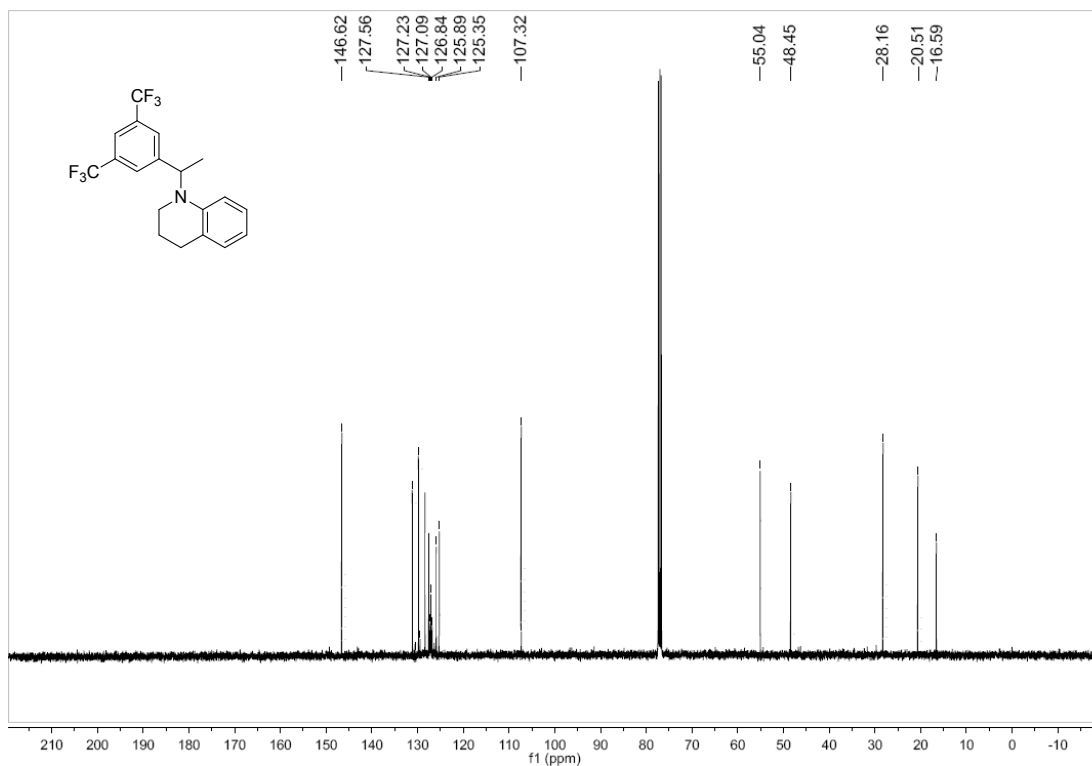

6k

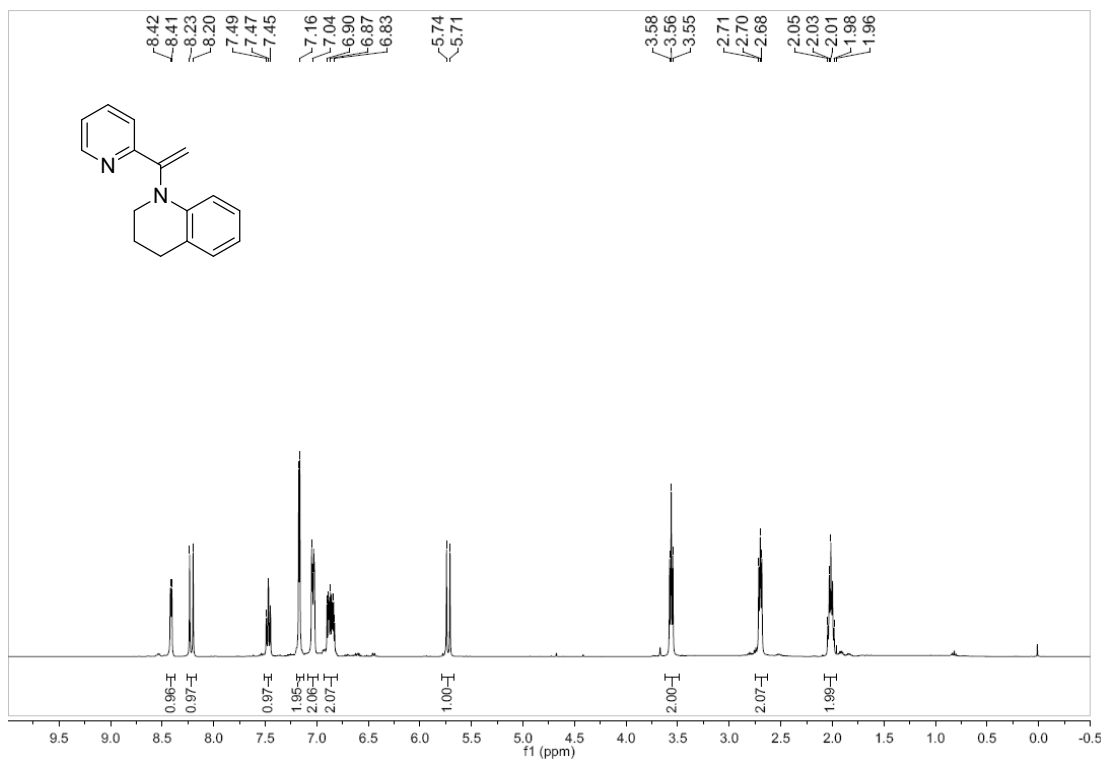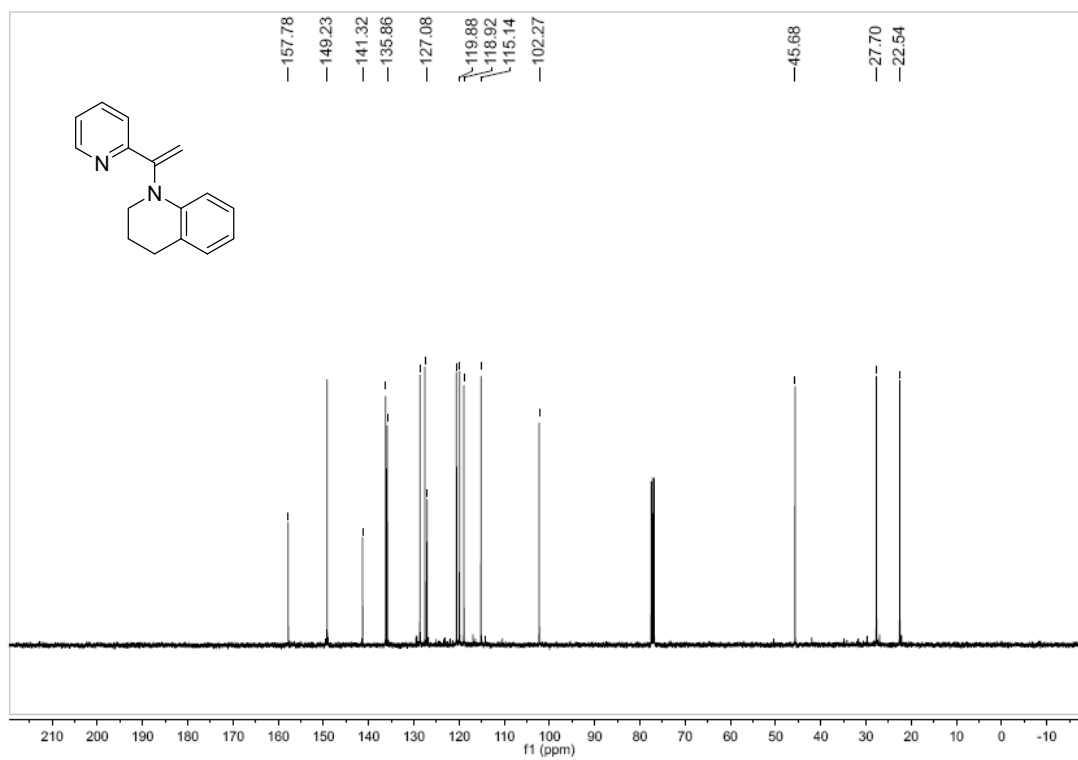



6l

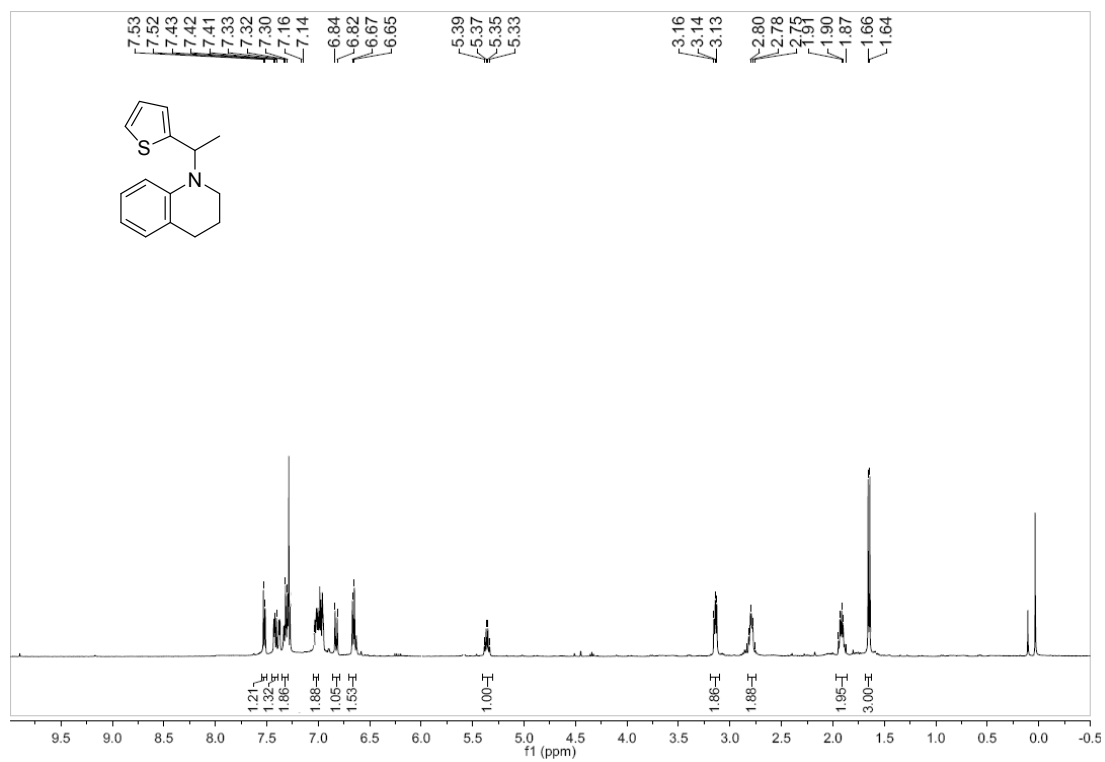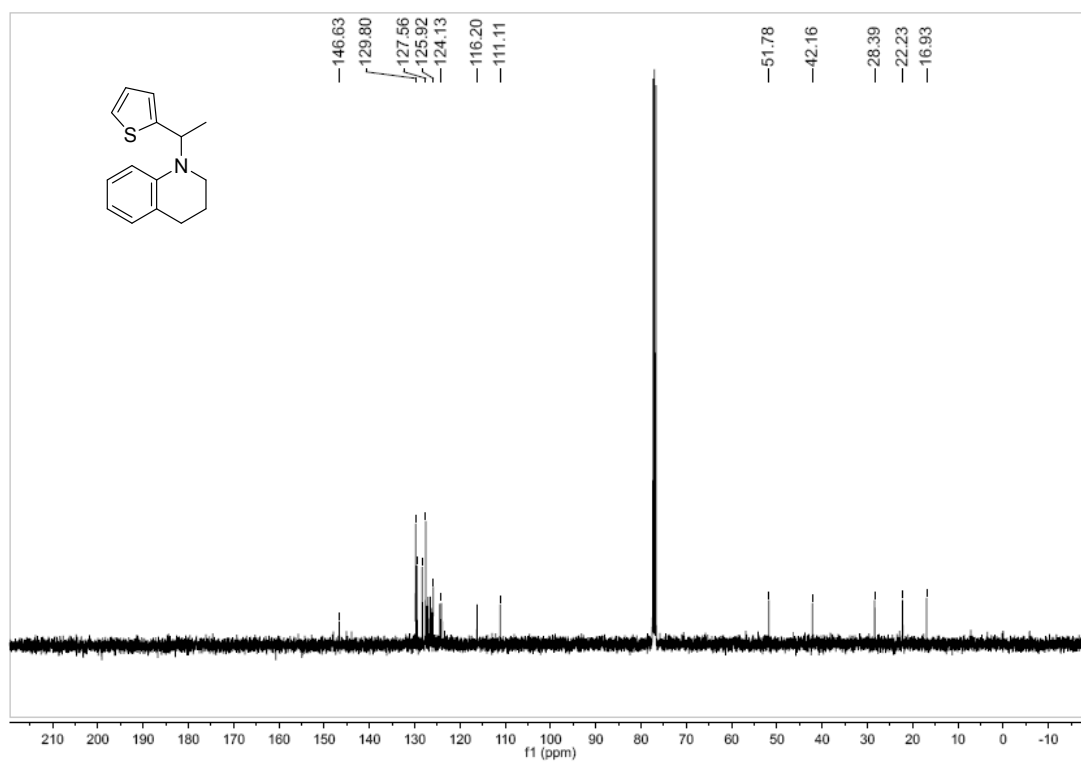

6m

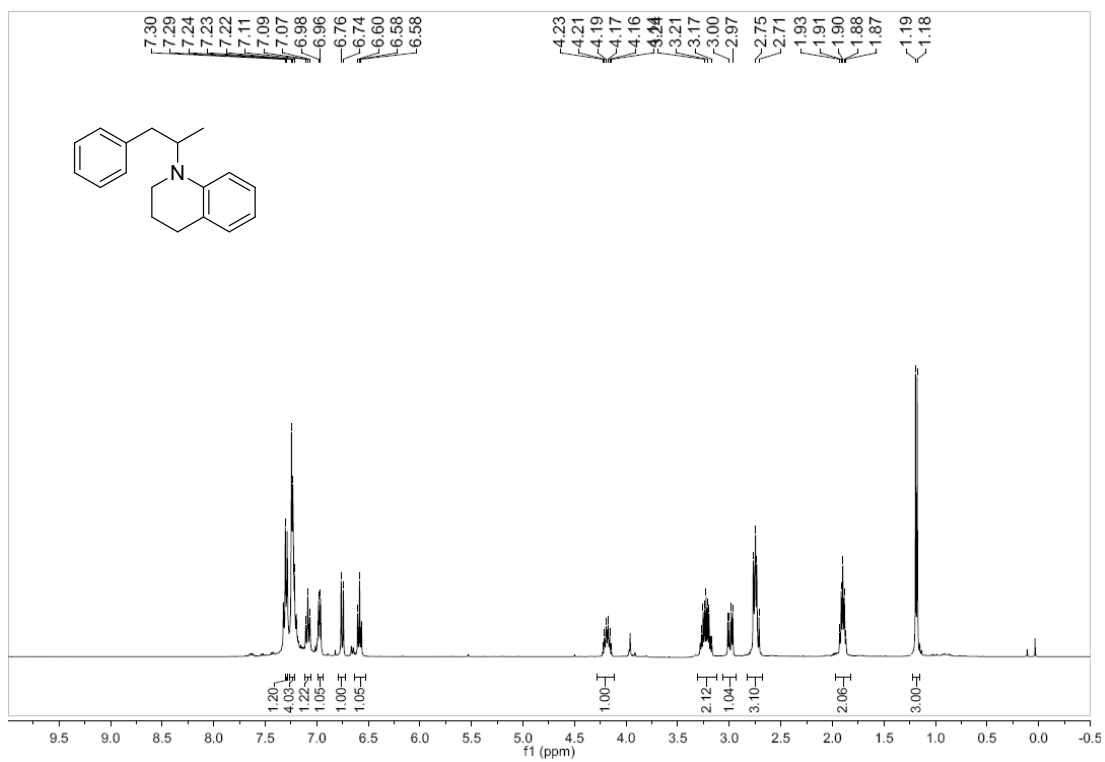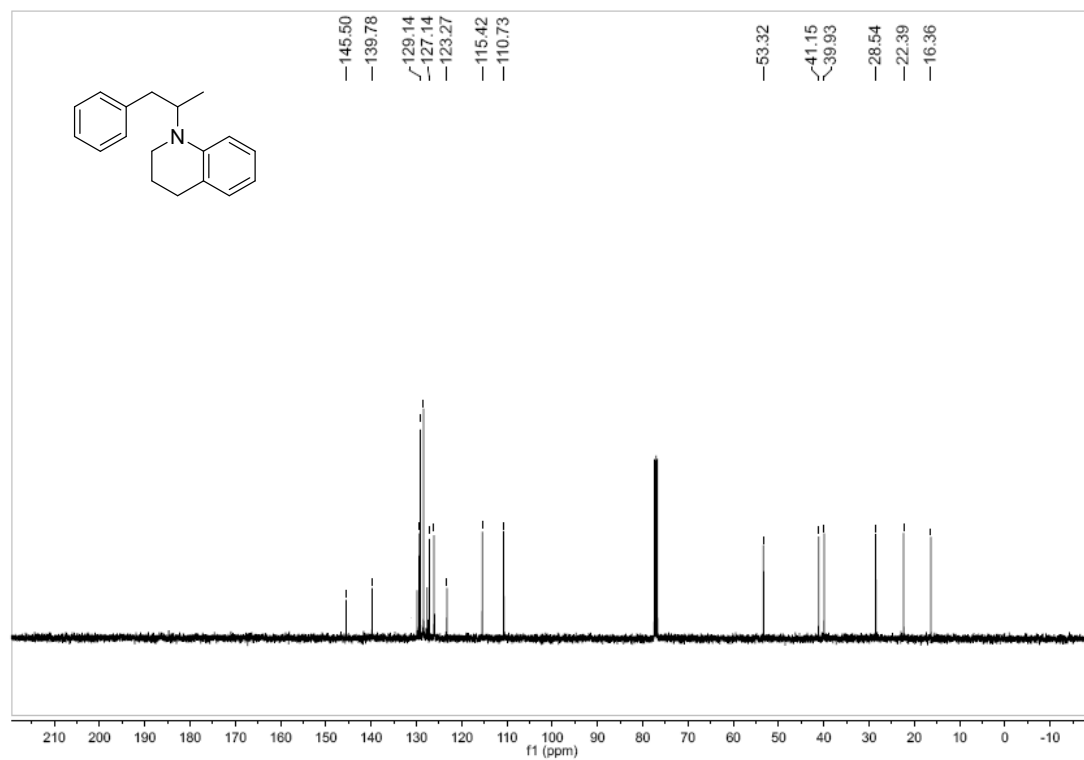

6n

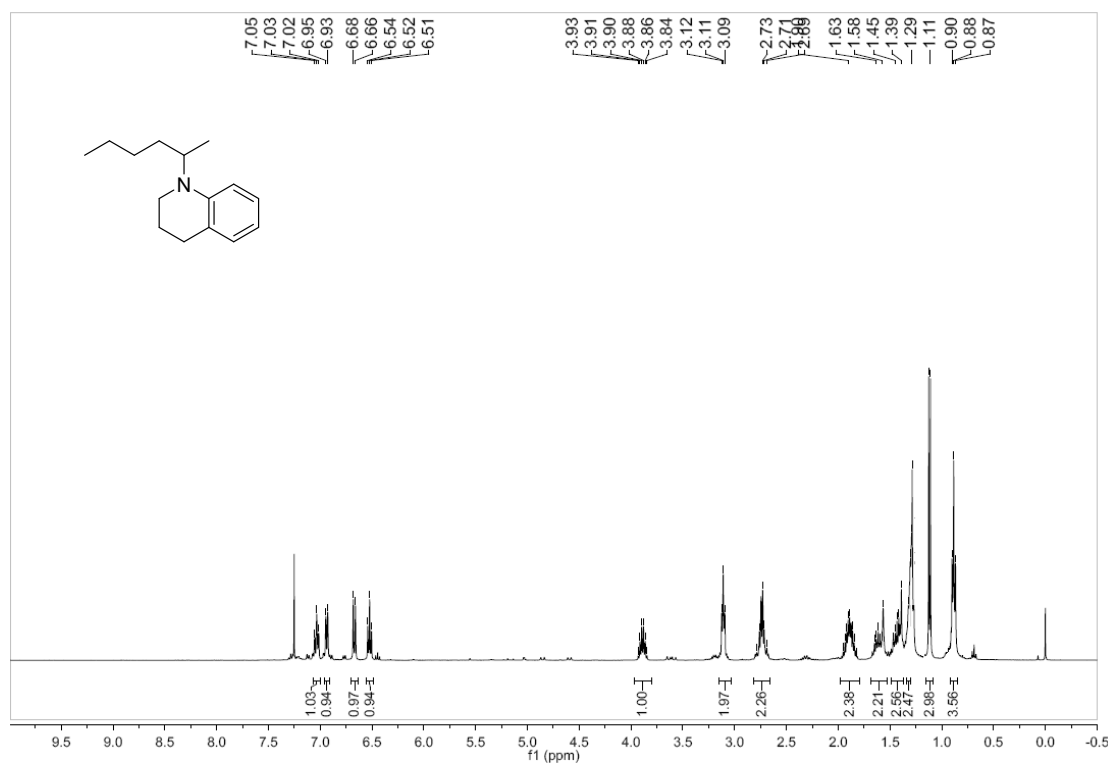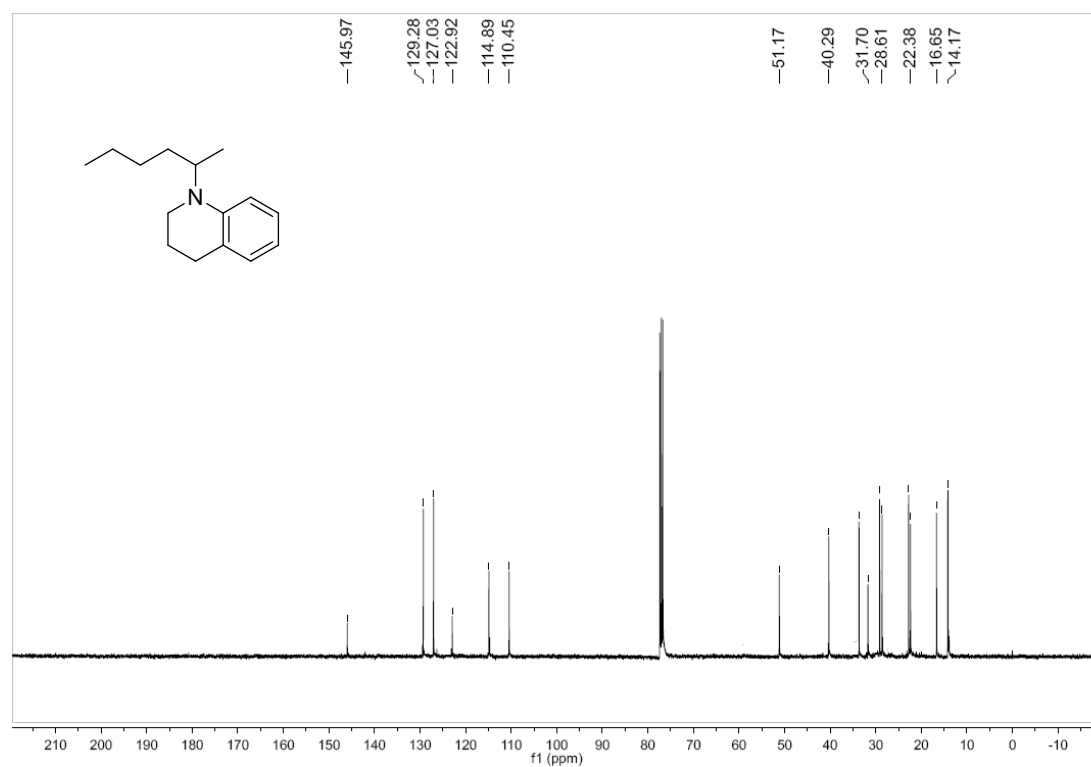

7d

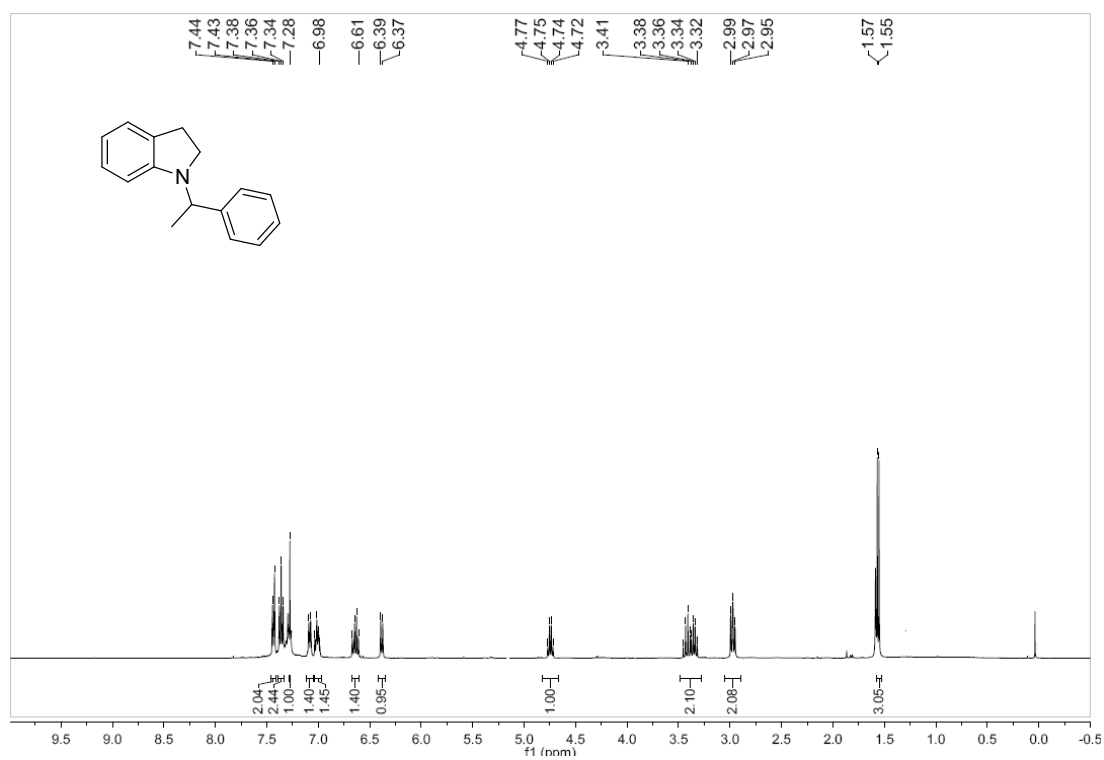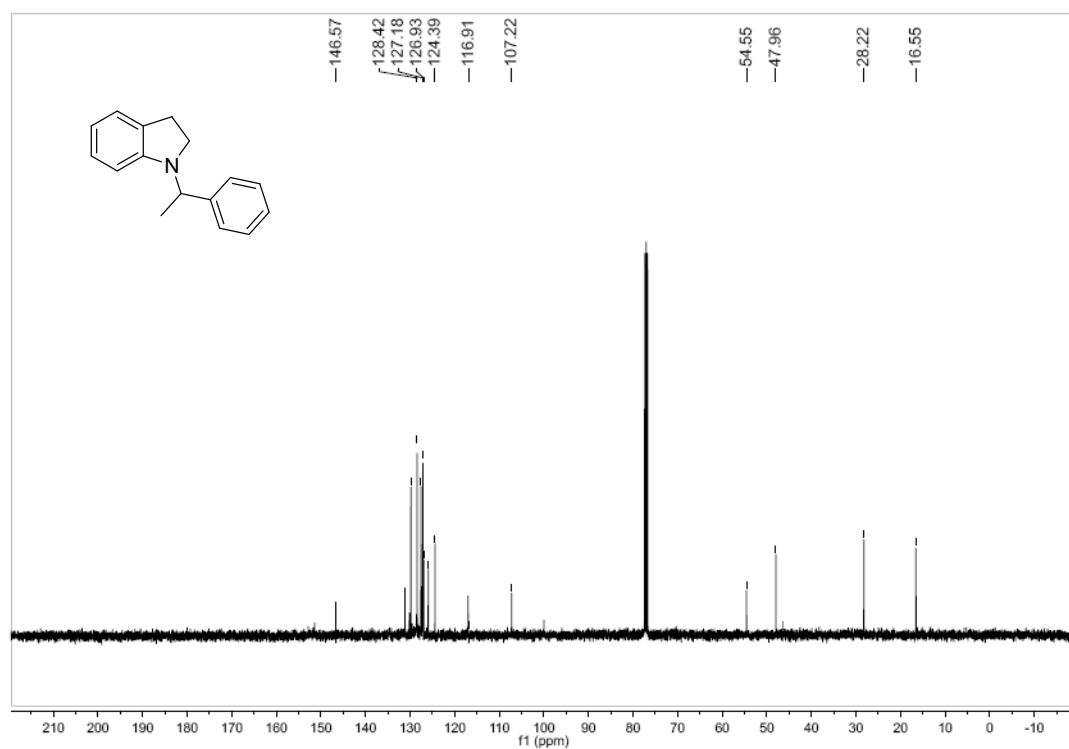

7e

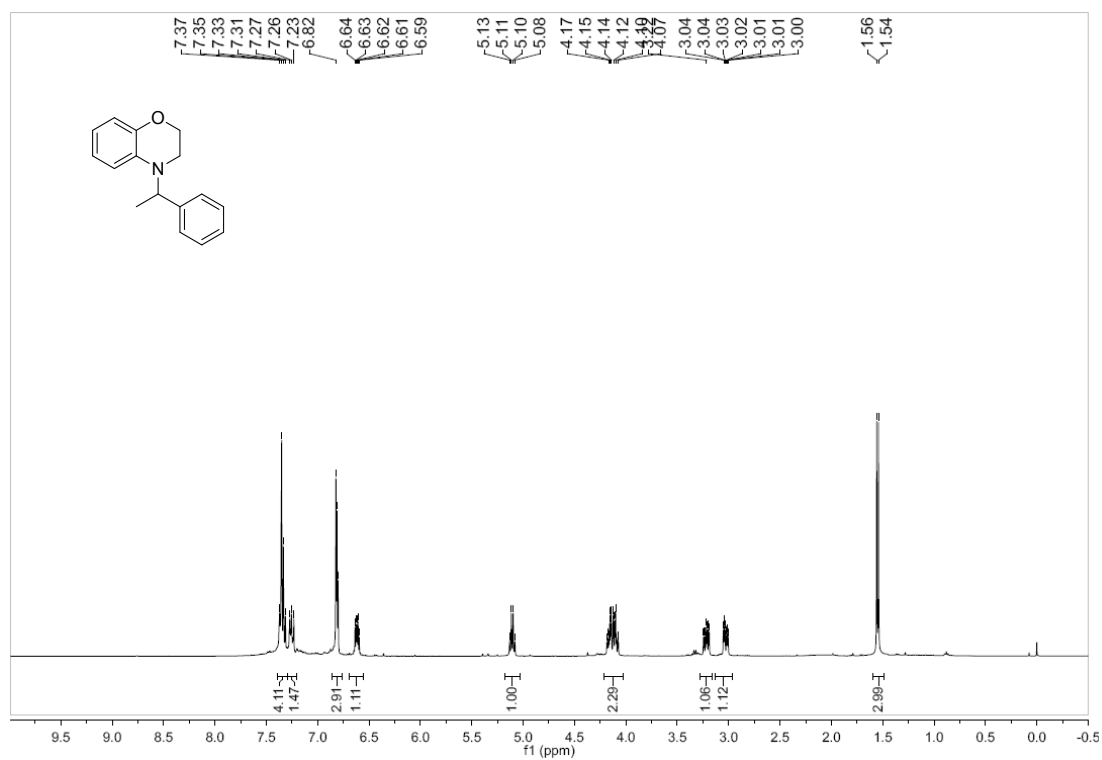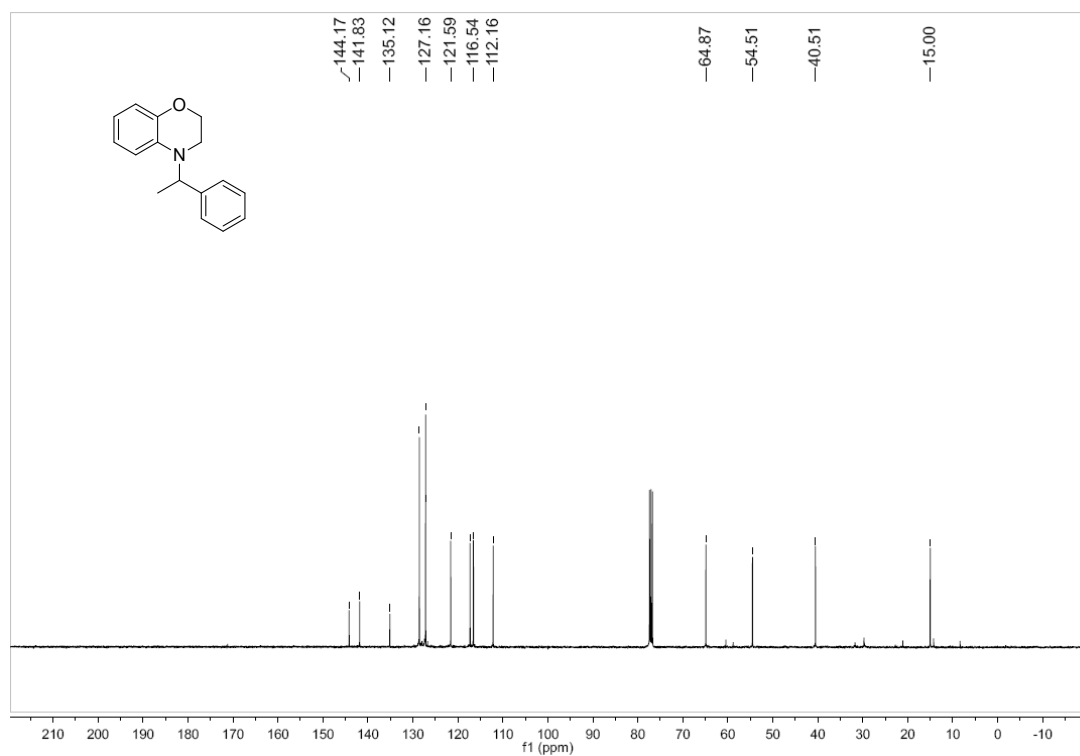

7f

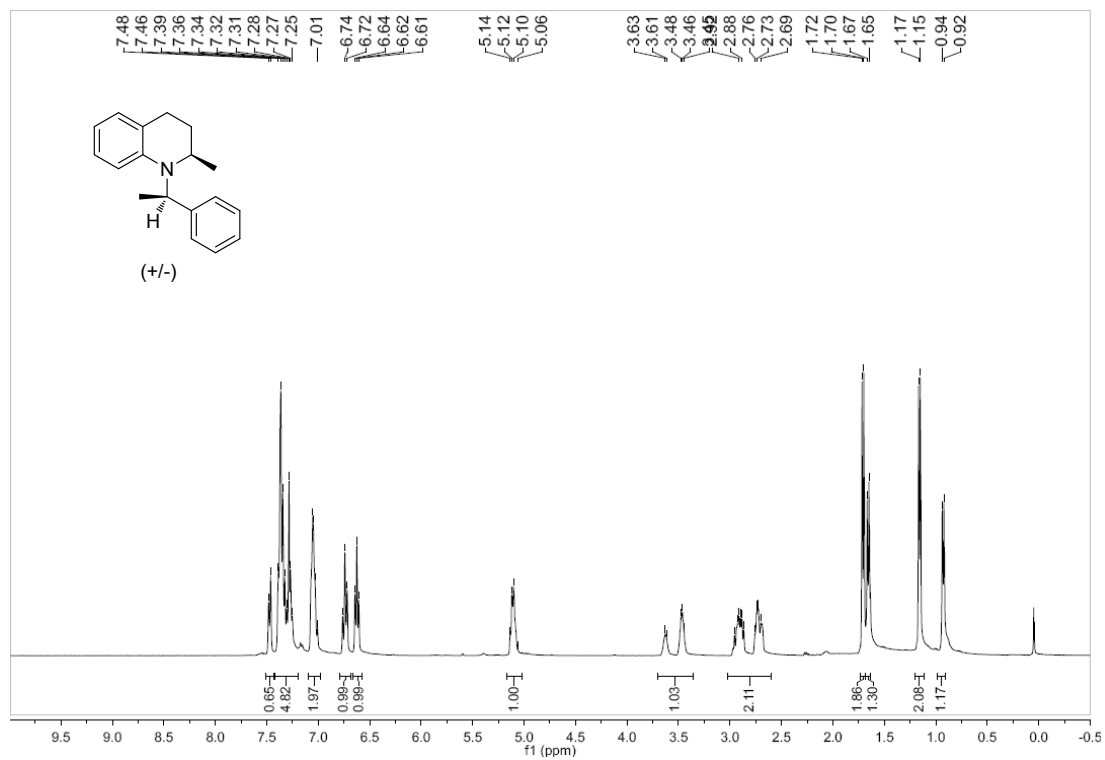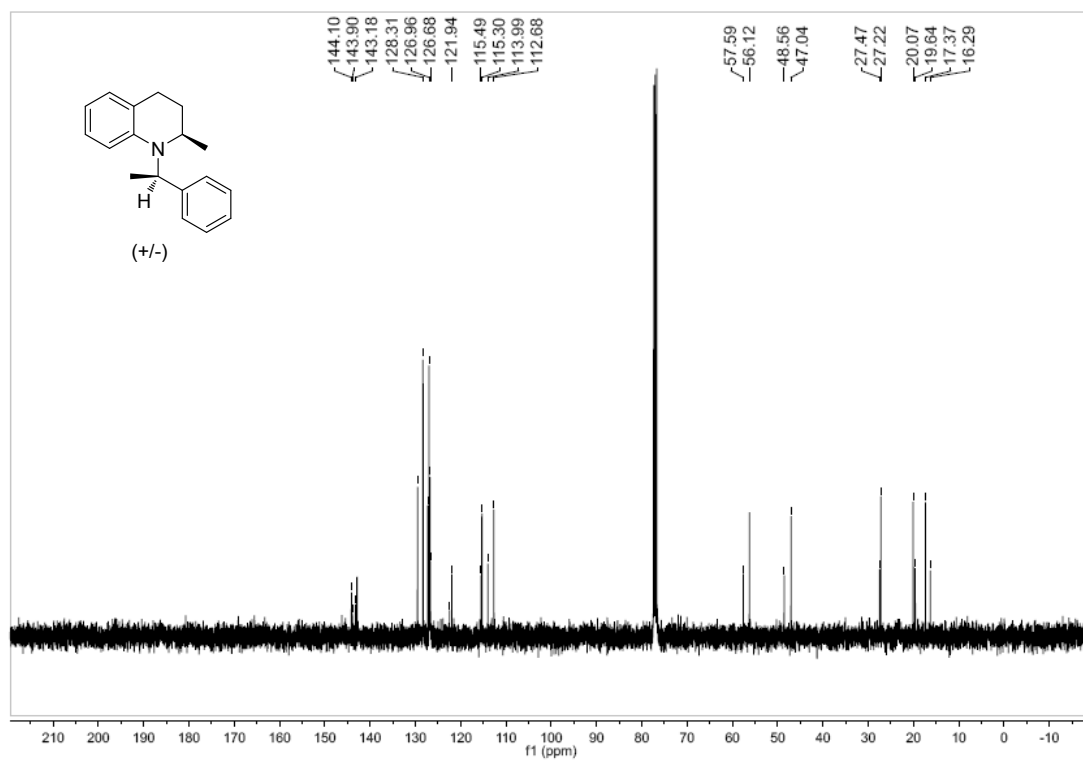

7g

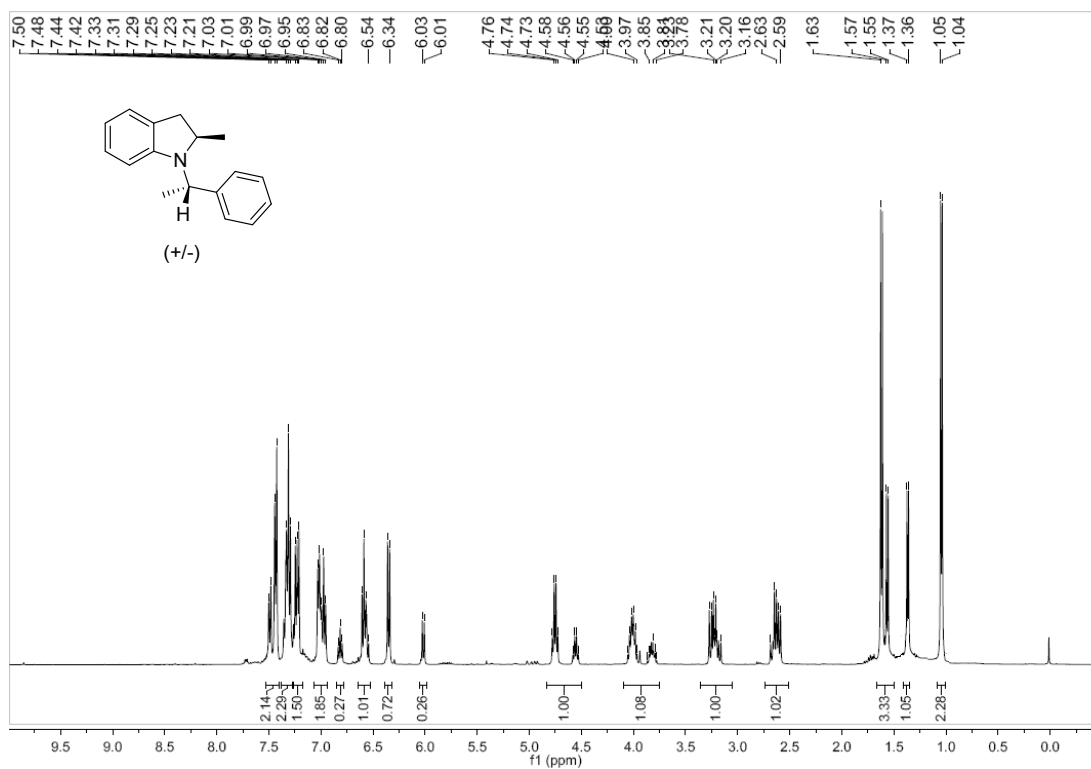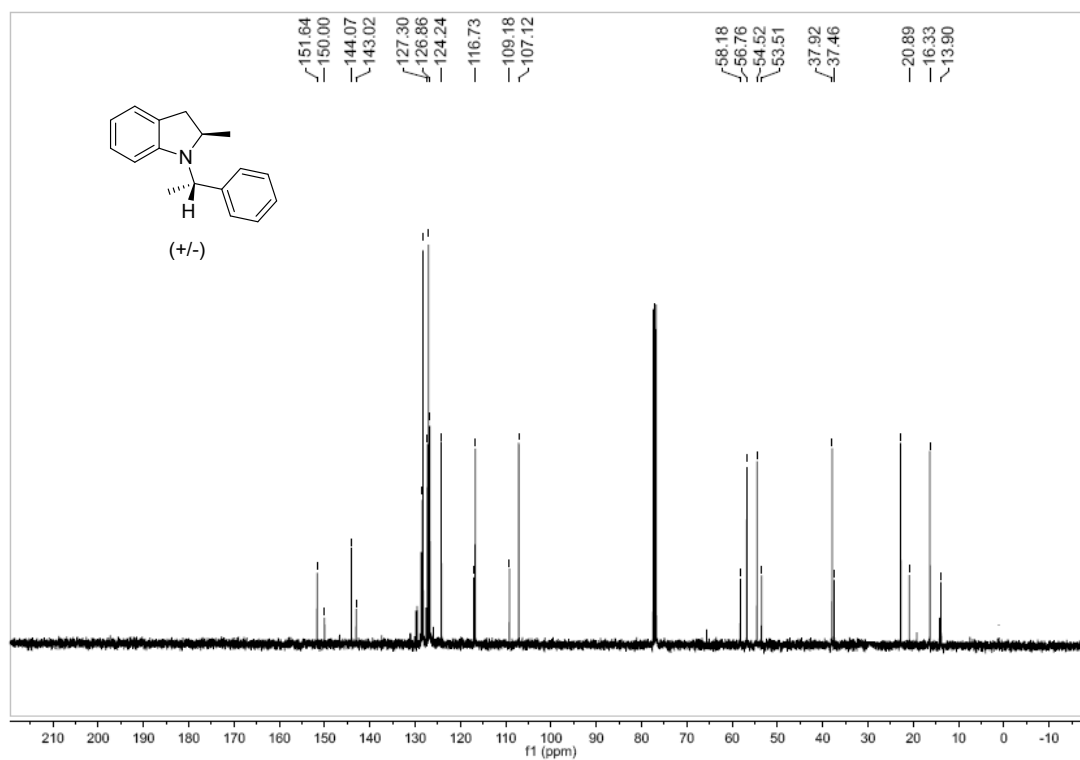

7h

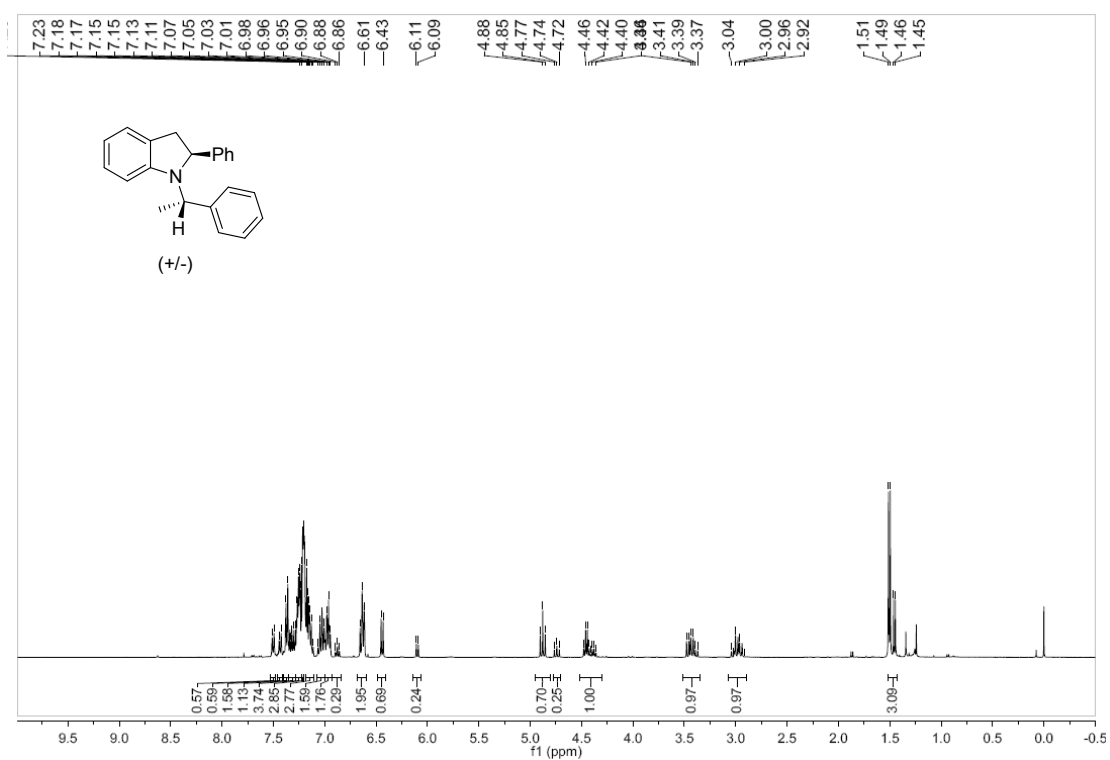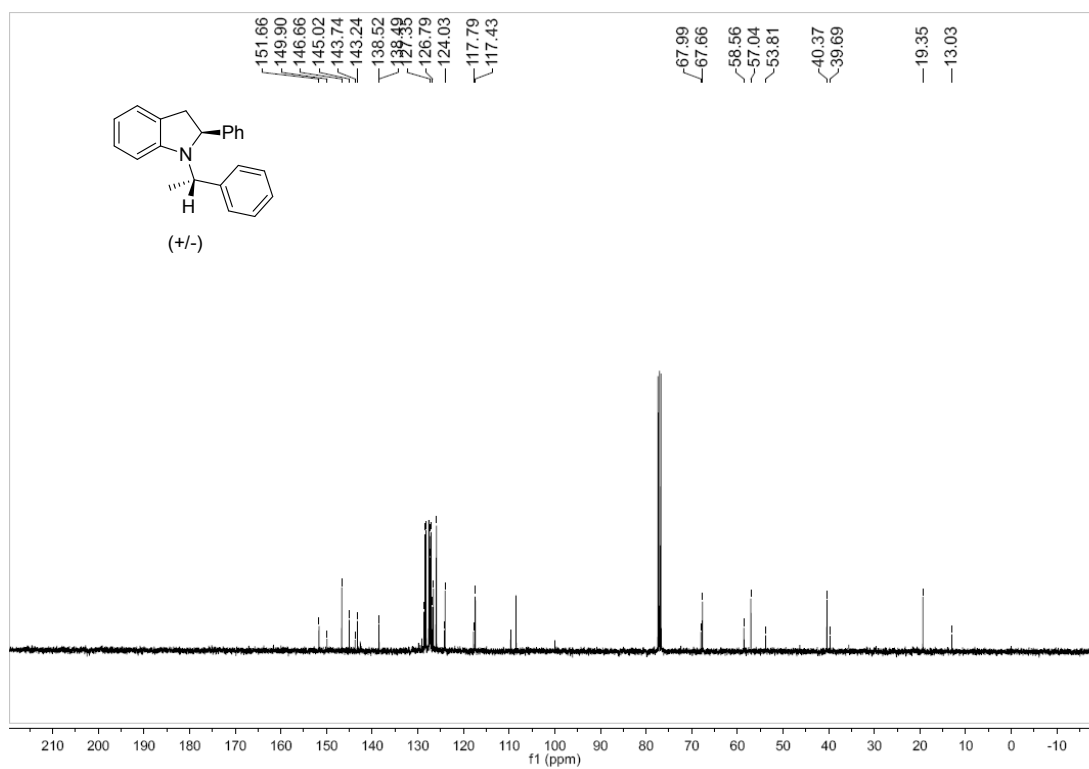



7i

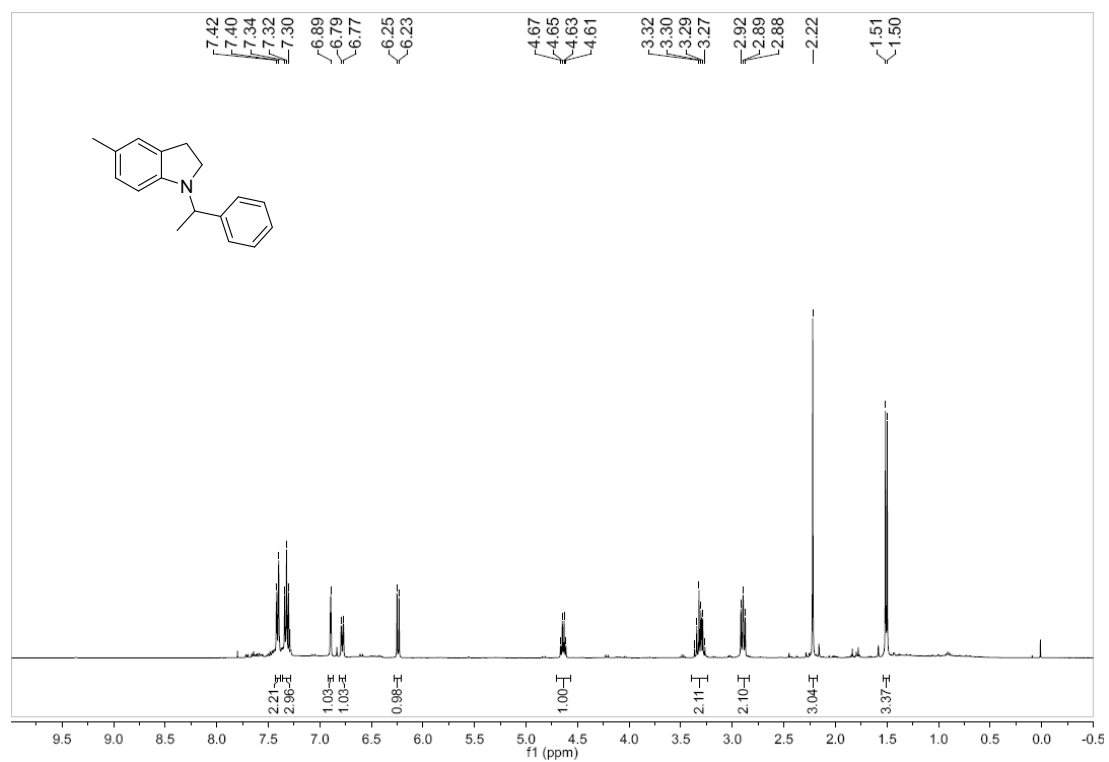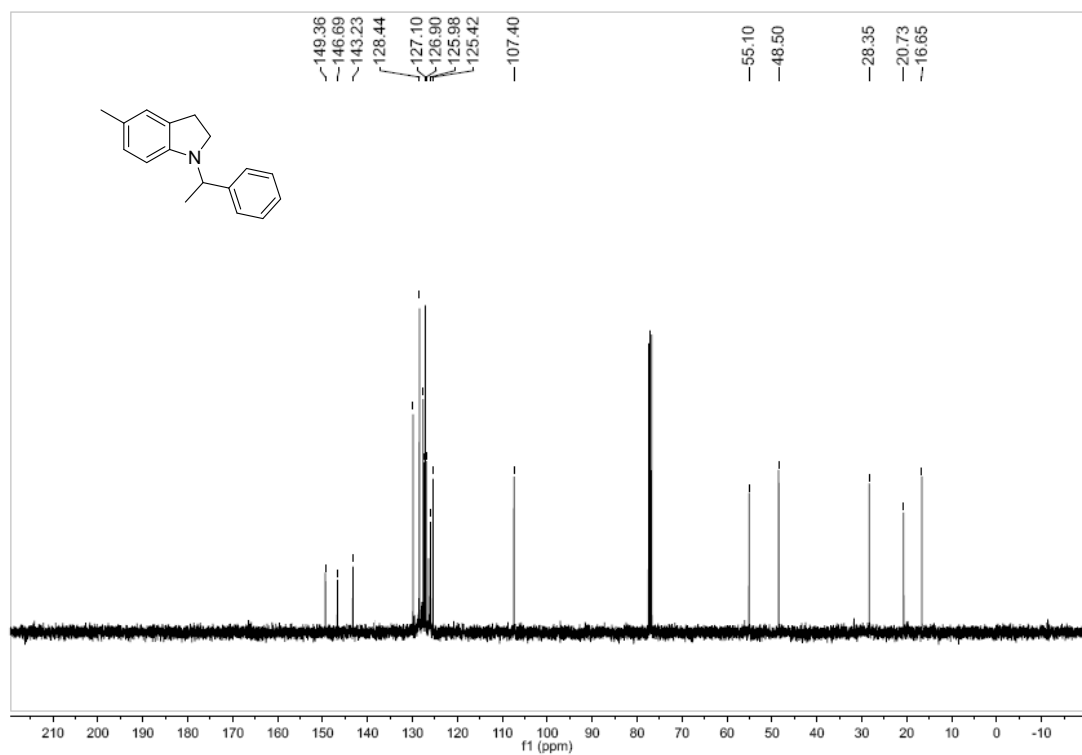

7j

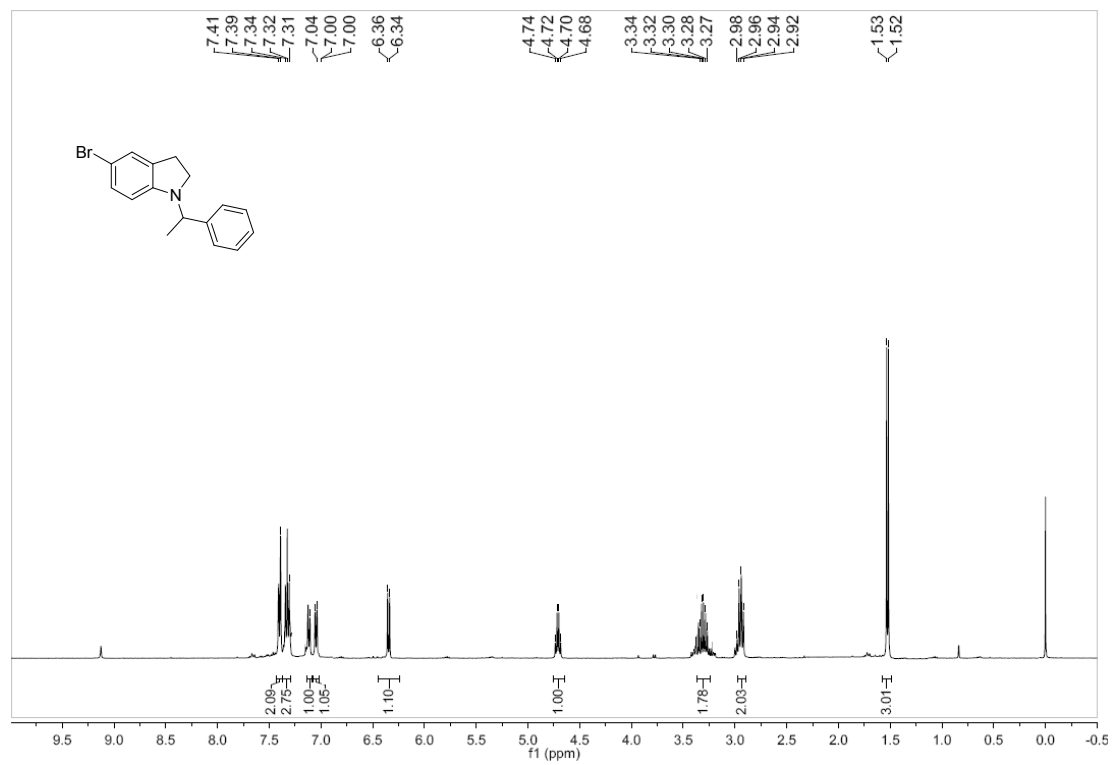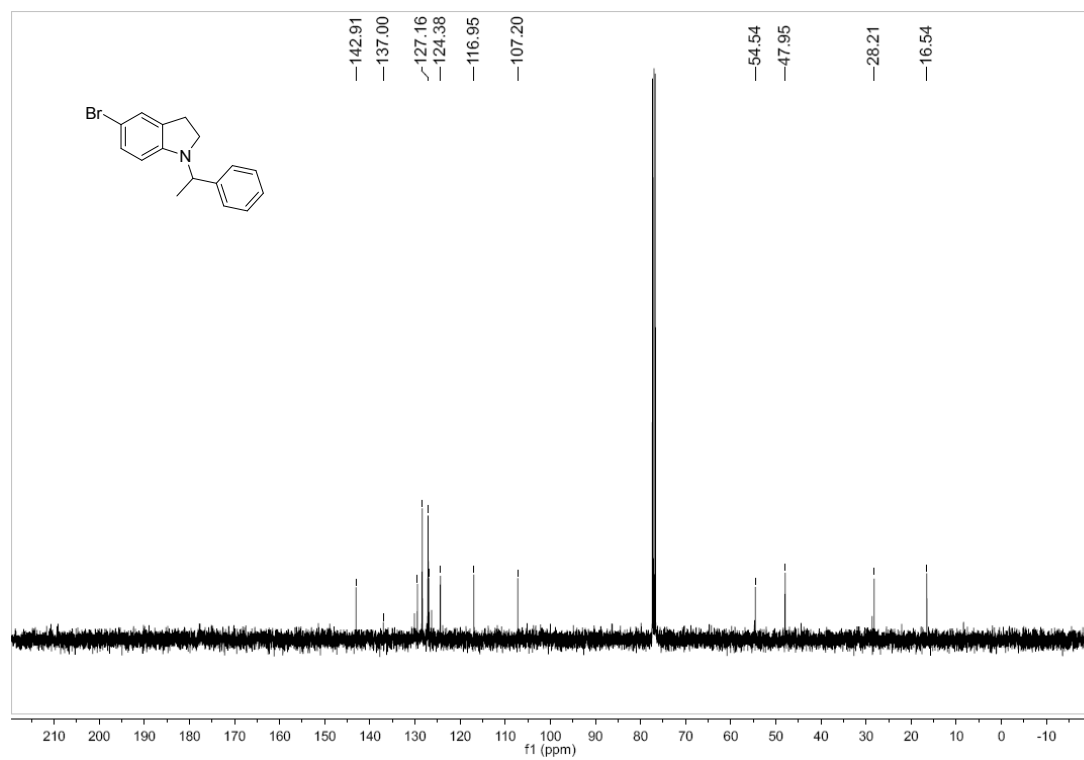

**$^1\text{H}$  NMR spectra (400 MHz,  $\text{PhBr-}d_5$ , ferrocene as internal standard) for kinetic study**

Condition:  $[\mathbf{4c}]_0 = 0.3636 \text{ mol}\cdot\text{L}^{-1}$ ,  $[\mathbf{5d}]_0 = 3.6374 \text{ mol}\cdot\text{L}^{-1}$ ; 10 mol% of complex **3** and TB; 0.6 mL  $\text{PhBr-}d_5$ ; 110 °C

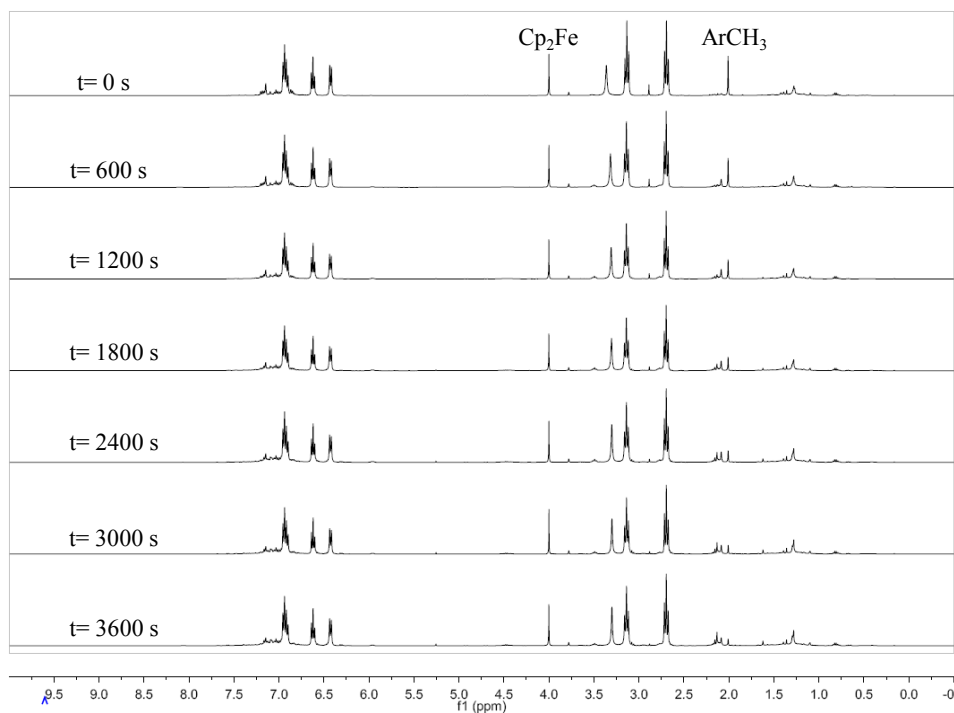

The plot of  $\ln[m\text{-tolylacetylene}]_0/[m\text{-tolylacetylene}]$  versus time (s) has been included in the maintext as Figure 2.

Condition:  $[4c]_0 = 0.3636 \text{ mol}\cdot\text{L}^{-1}$ ,  $[5d]_0 = 0.3636 \text{ mol}\cdot\text{L}^{-1}$ ; 10 mol% of complex **3** and TB; 0.6 mL PhBr- $d_5$ ; 110 °C

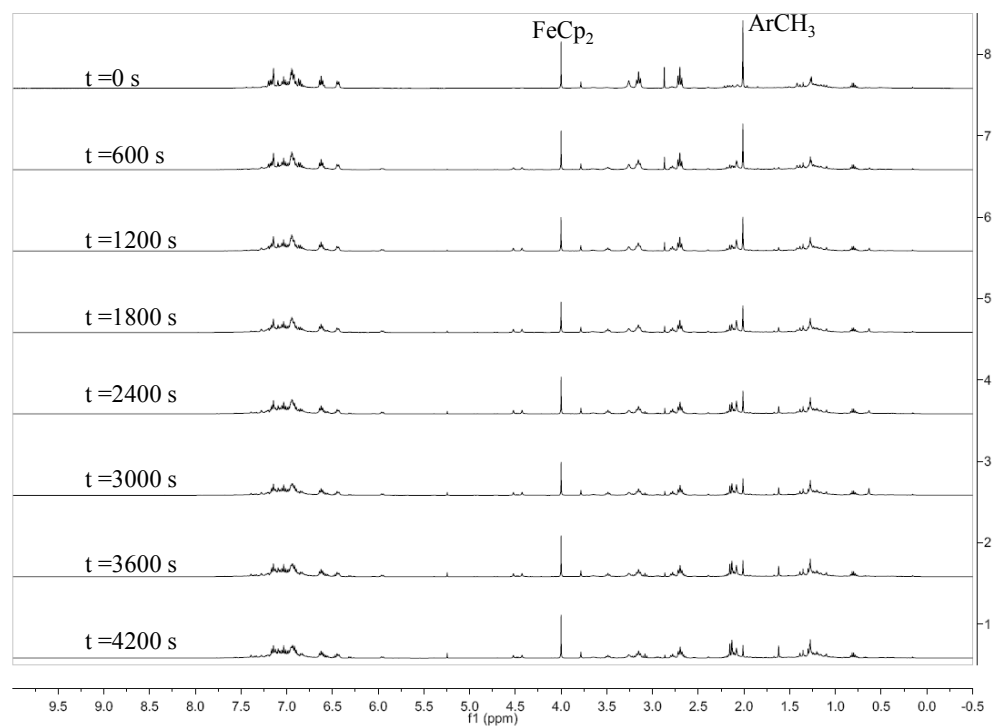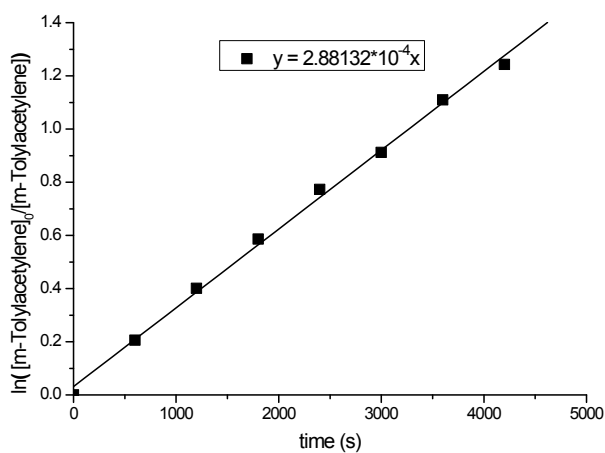

**Figure S1.** Plot of  $\ln[m\text{-tolylacetylene}]_0/[m\text{-tolylacetylene}]$  versus time (s) for the hydroamination reaction of  $m$ -tolylacetylene **4c** and indoline **5d** catalyzed by complex **3** and TB. Conditions:  $[4c]_0 = 0.3636 \text{ mol}\cdot\text{L}^{-1}$ ,  $[5d]_0 = 0.36363 \text{ mol}\cdot\text{L}^{-1}$ ; 10 mol% of complex **3** and TB, PhBr- $d_5$ , 110 °C.

Condition:  $[4c]_0 = 0.3636 \text{ mol}\cdot\text{L}^{-1}$ ,  $[5d]_0 = 0.7272 \text{ mol}\cdot\text{L}^{-1}$ ; 10 mol% of complex **3** and TB; 0.6 mL PhBr- $d_5$ ; 110 °C

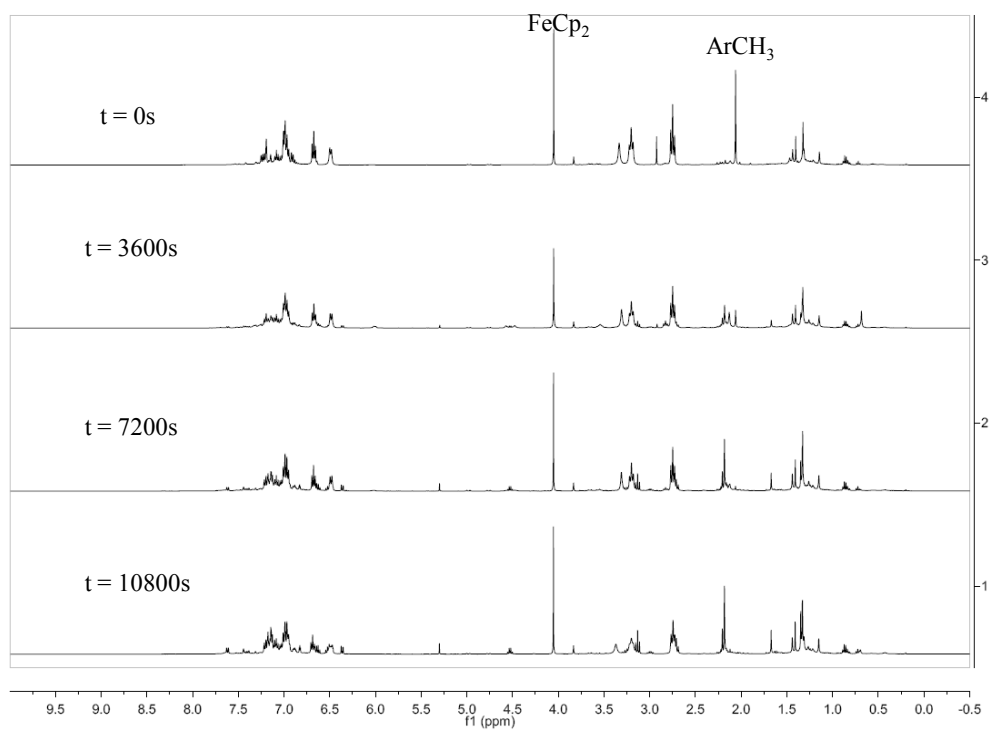

### Crystallographic data for complex 3

**Table S1** Selected bond lengths (Å) and bond angles (deg) for complex 3

| <b>Bond lengths</b> |            |
|---------------------|------------|
| Zr1-O1              | 1.995(2)   |
| Zr1-O2              | 1.999(2)   |
| Zr1-N1              | 2.351(3)   |
| Zr1-C35             | 2.271(5)   |
| Zr1-C42             | 2.291(5)   |
| <b>Bond angles</b>  |            |
| O1-Zr1-O2           | 156.85(9)  |
| O1-Zr1-C35          | 97.97(17)  |
| O2-Zr1-C35          | 98.20(17)  |
| O1-Zr1-C42          | 92.95(13)  |
| O2-Zr1-C42          | 94.21(12)  |
| C35-Zr1-C42         | 117.35(16) |
| O1-Zr1-N1           | 78.94(9)   |
| O2-Zr1-N1           | 79.13(9),  |
| C35-Zr1-N1          | 115.97(15) |
| C42-Zr1-N1          | 126.67(13) |
| O1-Zr1-C43          | 96.24(10)  |
| O2-Zr1-C43          | 101.57(10) |
| C35-Zr1-C43         | 84.98(16)  |
| C42-Zr1-C43         | 32.42(13)  |
| N1-Zr1 -C43         | 158.87(11) |

**Table S2.** Crystallographic data for complex **3**

| <b>3</b>                                        |                                                    |
|-------------------------------------------------|----------------------------------------------------|
| formula                                         | C <sub>48</sub> H <sub>67</sub> NO <sub>2</sub> Zr |
| fw                                              | 781.25                                             |
| Temp (K)                                        | 223                                                |
| cryst syst                                      | Orthorhombic                                       |
| color, habit                                    | colorless, prism                                   |
| cryst size(mm)                                  | 0.80×0.65×0.50                                     |
| space group                                     | <i>P2<sub>1</sub>/c</i>                            |
| <i>a</i> (Å)                                    | 11.214(5)                                          |
| <i>b</i> (Å)                                    | 17.371(6)                                          |
| <i>c</i> (Å)                                    | 23.224(11)                                         |
| <i>α</i> (deg)                                  | 90                                                 |
| <i>β</i> (deg)                                  | 90                                                 |
| <i>γ</i> (deg)                                  | 90                                                 |
| <i>V</i> (Å <sup>3</sup> )                      | 4524.0(3)                                          |
| <i>Z</i>                                        | 4                                                  |
| <i>D</i> <sub>calcd</sub> (g cm <sup>-3</sup> ) | 1.147                                              |
| radiation used                                  | Mo Kα                                              |
| <i>μ</i> (mm <sup>-1</sup> )                    | 0.278                                              |
| <i>F</i> (000)                                  | 1672.0                                             |
| <i>θ</i> <sub>max</sub> (deg)                   | 1.79-26.50                                         |
| no. of unique data                              | 9286                                               |
| max, min transm                                 | 0.799, 1.000                                       |
| No. of variables                                | 445                                                |
| final R indices ( <i>I</i> > 2σ( <i>I</i> ))    | R <sub>1</sub> = 0.0469, wR <sub>2</sub> = 0.2061  |
| R indices (all data)                            | R <sub>1</sub> = 0.1081, wR <sub>2</sub> = 0.1162  |
| goodness-of-fit on <i>F</i> <sup>2</sup>        | 1.048                                              |
| Largest diff. peak, hole/e Å <sup>-3</sup>      | 0.805, -0.613                                      |

---

## References

- 1 (a) J. J. Felten, W. P. Anderson, *J. Organomet. Chem.* 1972, **36**, 87. (b) E. Y. Tshuva, I. Goldberg, M. Kol, *Organometallics* 2001, **20**, 3017. (c) E.Y. Tshuva, I. Goldberg, M. Kol, H. Weitmanb and Z. Goldschmidt, *Chem. Commun.* 2000, 379. (d) Q. Sun, Y. Wang, D. Yuan, Y. Yao and Q. Shen, *Organometallics* 2014, **33**, 994.
- 2 SMART version 5.628; Bruker AXS Inc.: Madison, WI, 2001.
- 3 SAINT+ version 6.22a; Bruker AXS Inc.: Madison, WI, 2001.
- 4 Sheldrick, G. W. *SADABS version 2.10*; University of Göttingen, 2001.
- 5 SHELXTL version 6.14; Bruker AXS Inc.: Madison, WI, 2000.
